# Supplementary material for: First total synthesis of the whole series of the antiostatins A and B
Source: Royal Society of Chemistry journal article supplement (doi:10.1039/b821039j), 2009-01-01
Supplement: b821039j-3.pdf [file b821039j-3.pdf]

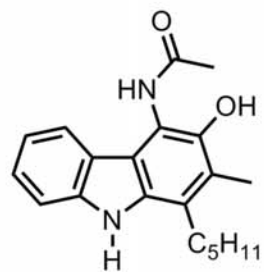

Antiostatin A<sub>1</sub> (1a)

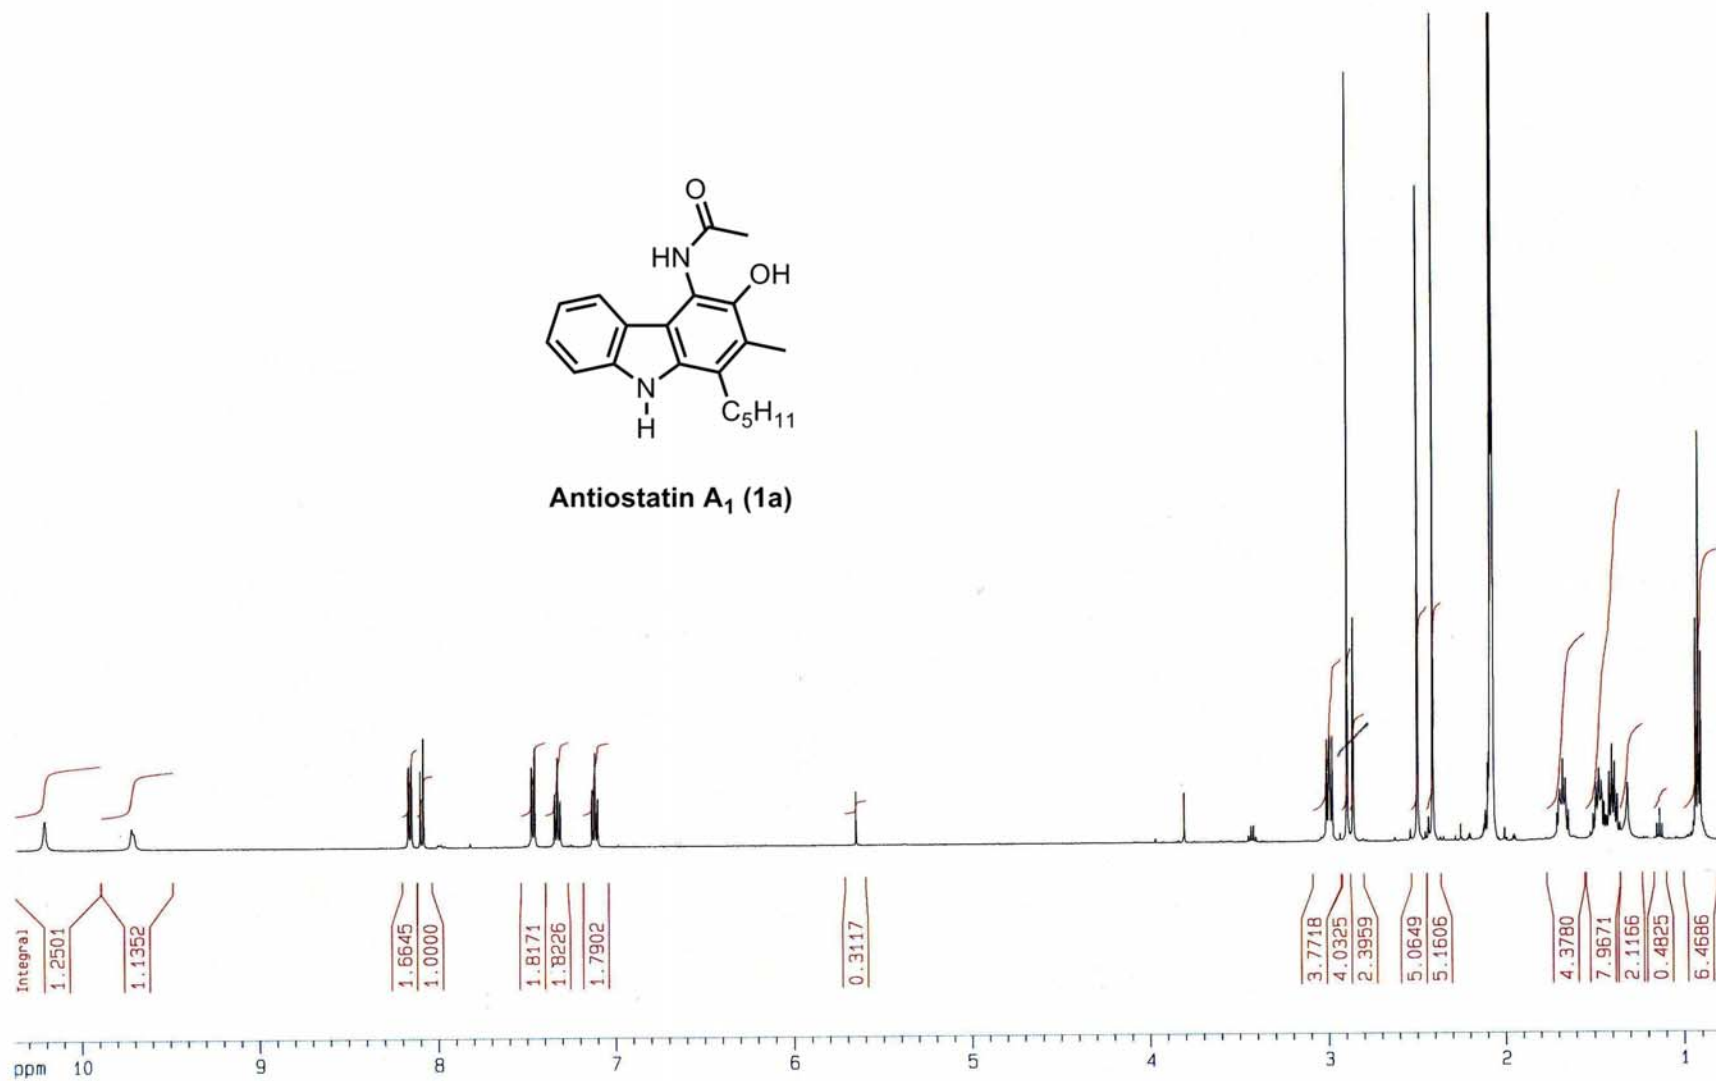

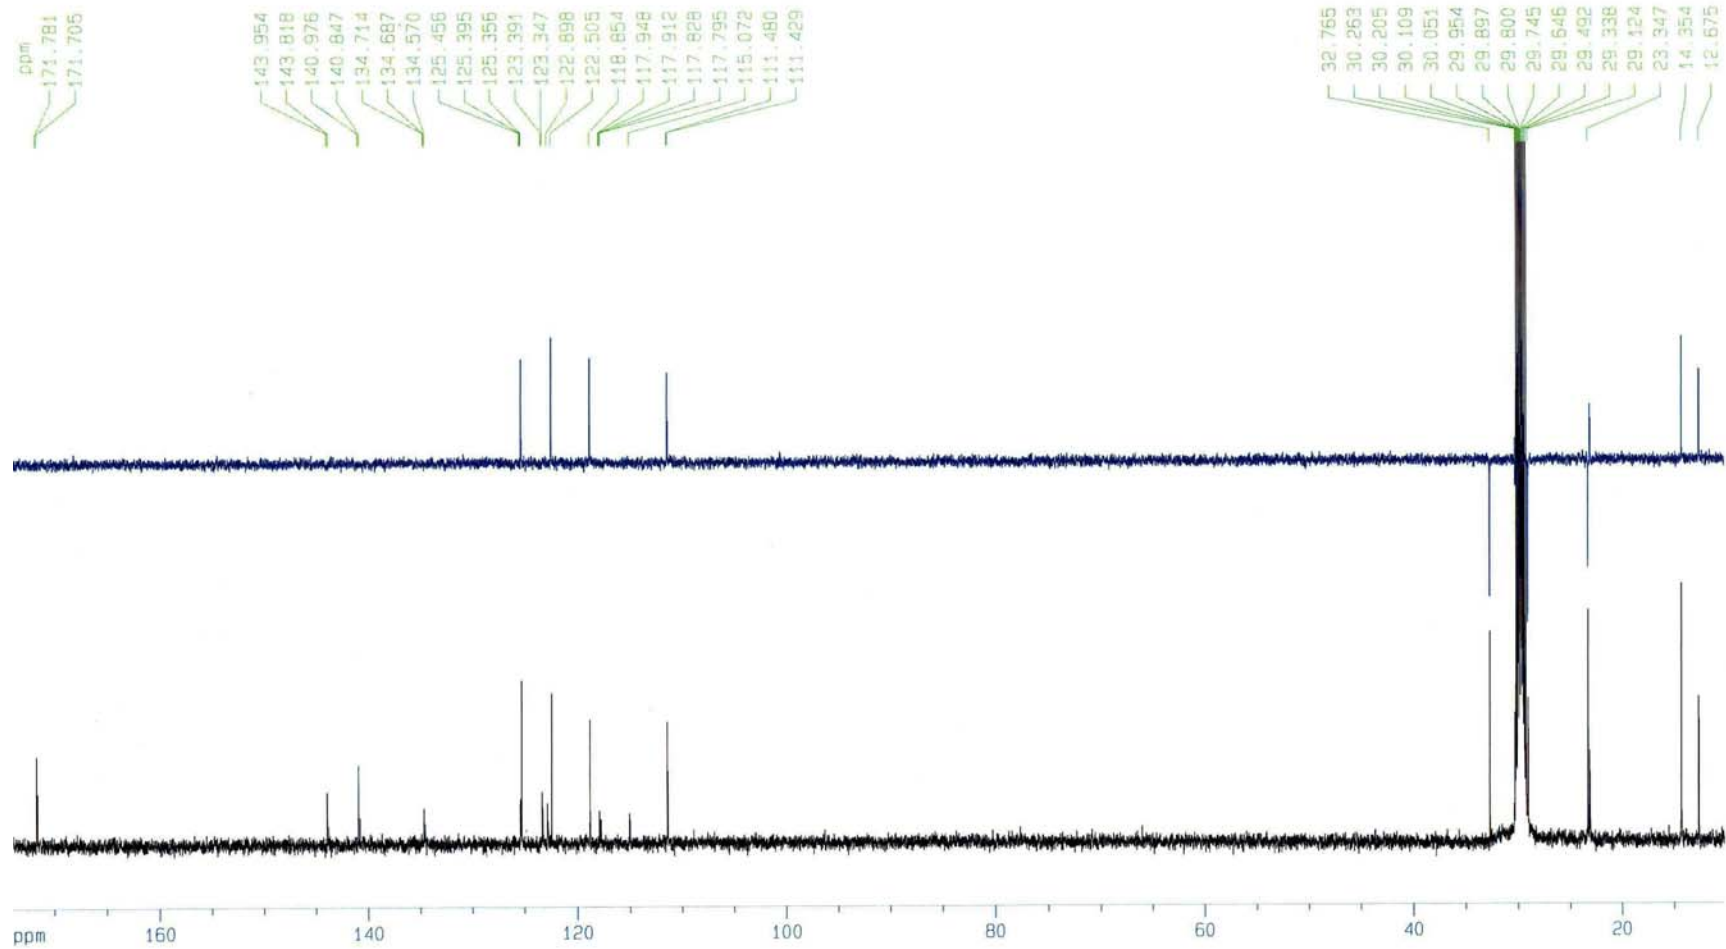

<sup>1</sup>H NMR of natural antiostatin A<sub>2</sub> (1b); provided by Prof. Seto

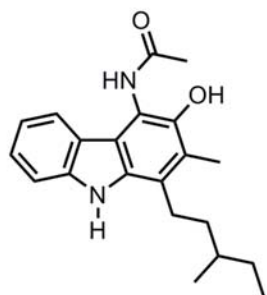

Antiostatin A<sub>2</sub> (1b)

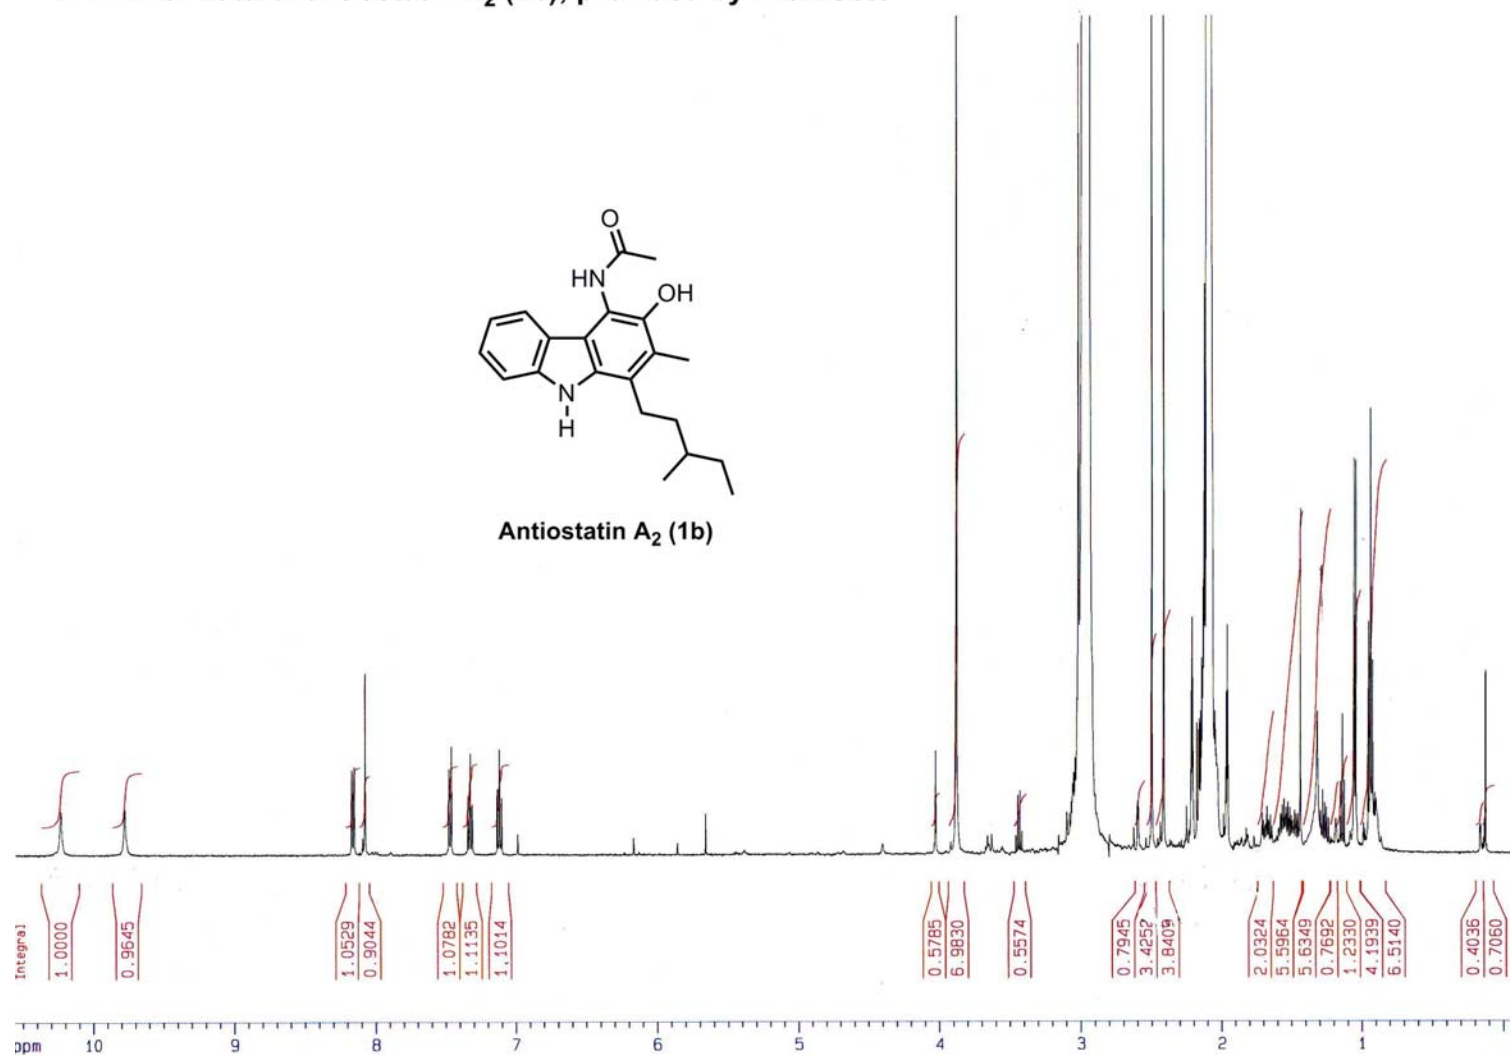

# <sup>1</sup>H NMR of synthetic antiostatin A<sub>2</sub> (1b)

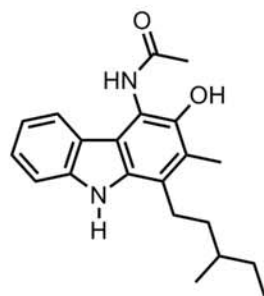

Antiostatin A<sub>2</sub> (1b)

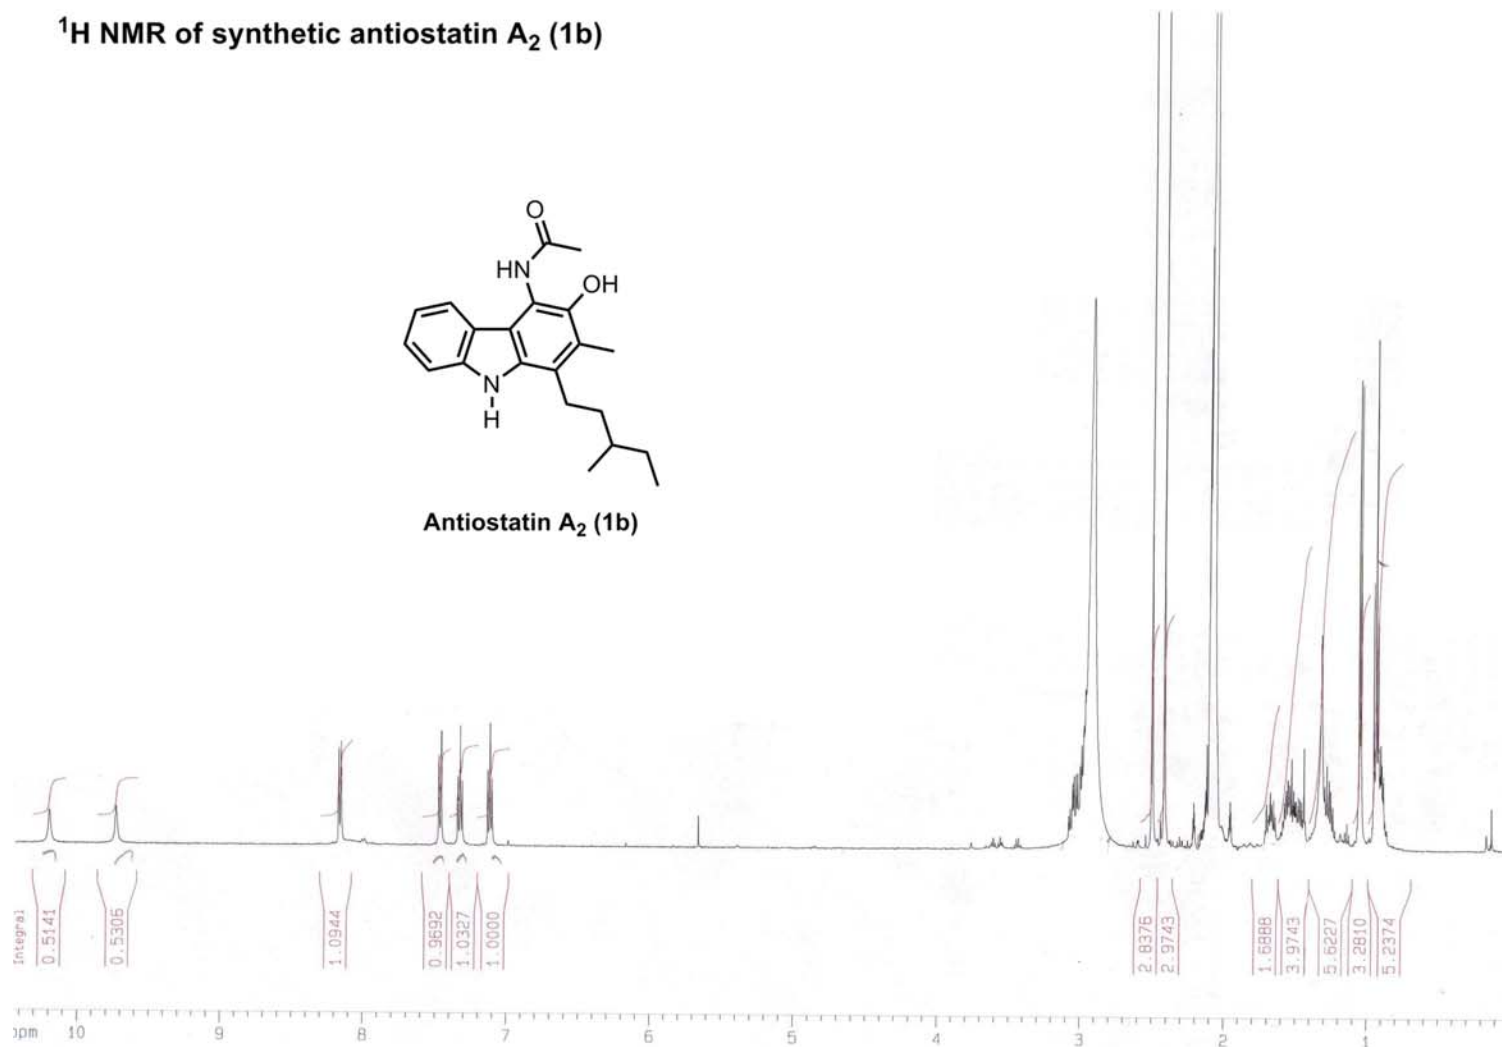

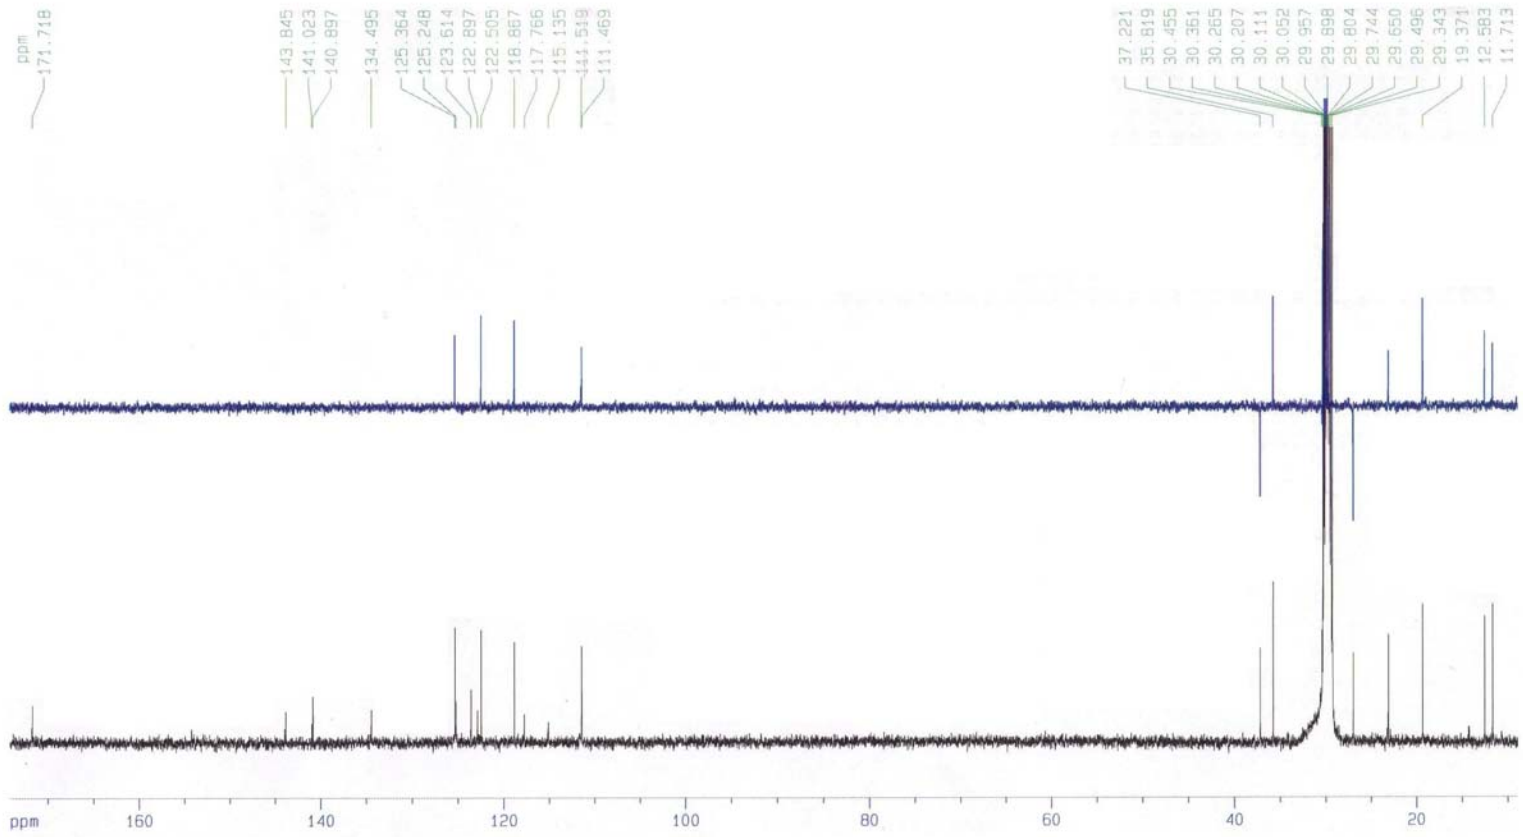

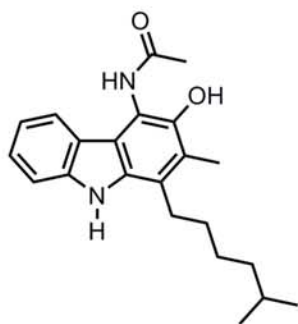

Antiostatins A<sub>3</sub> (1c)

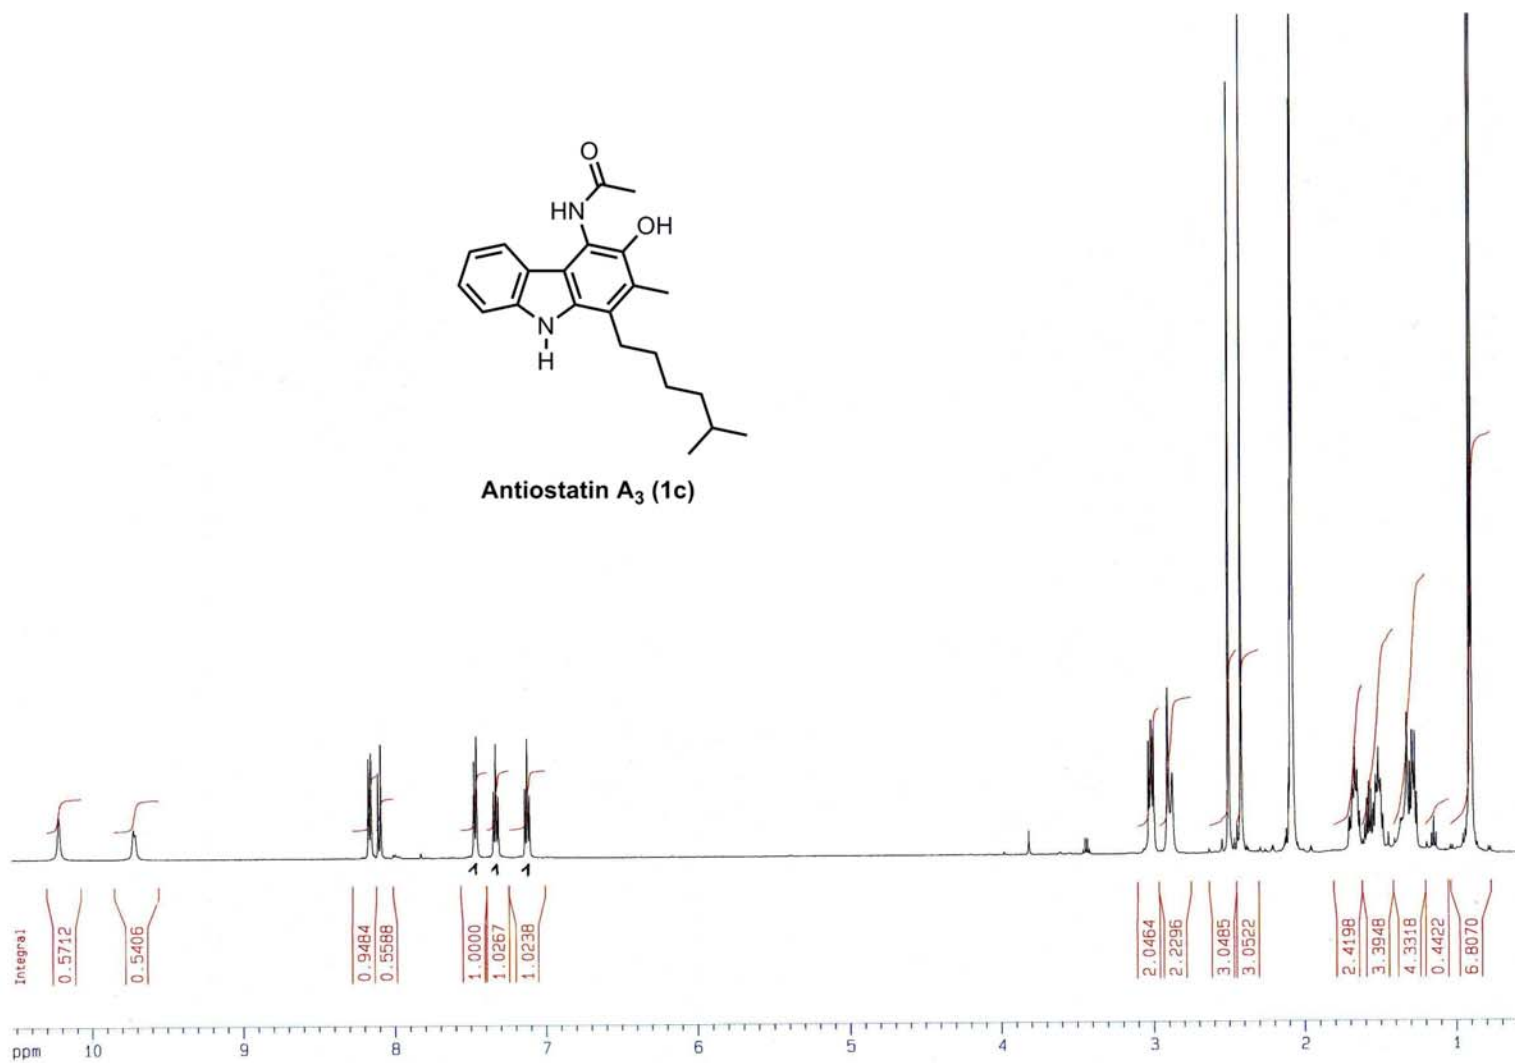

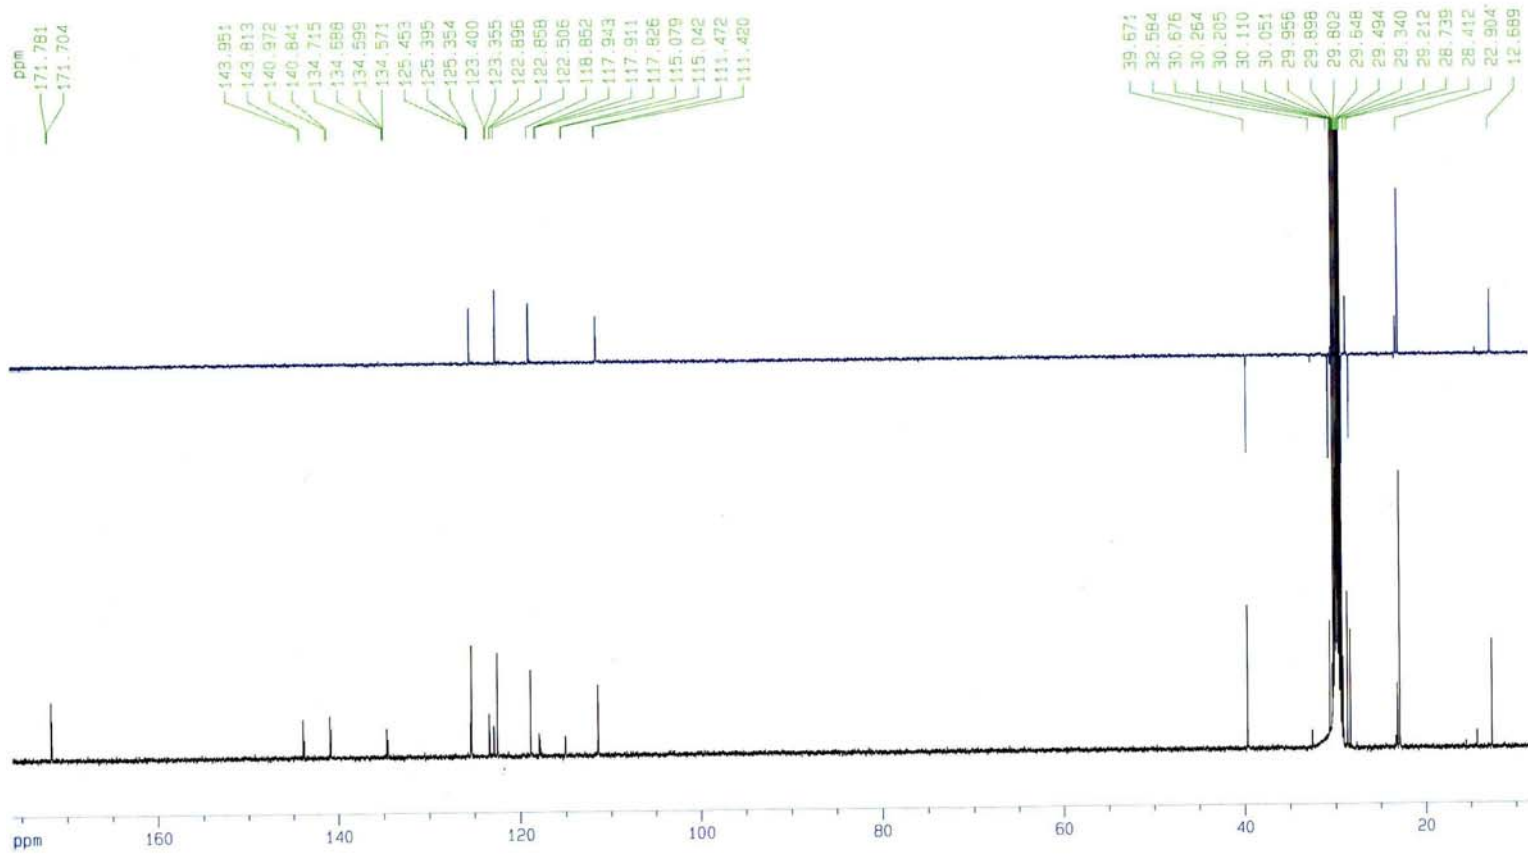

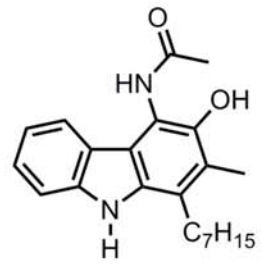

Antiostatin A<sub>4</sub> (1d)

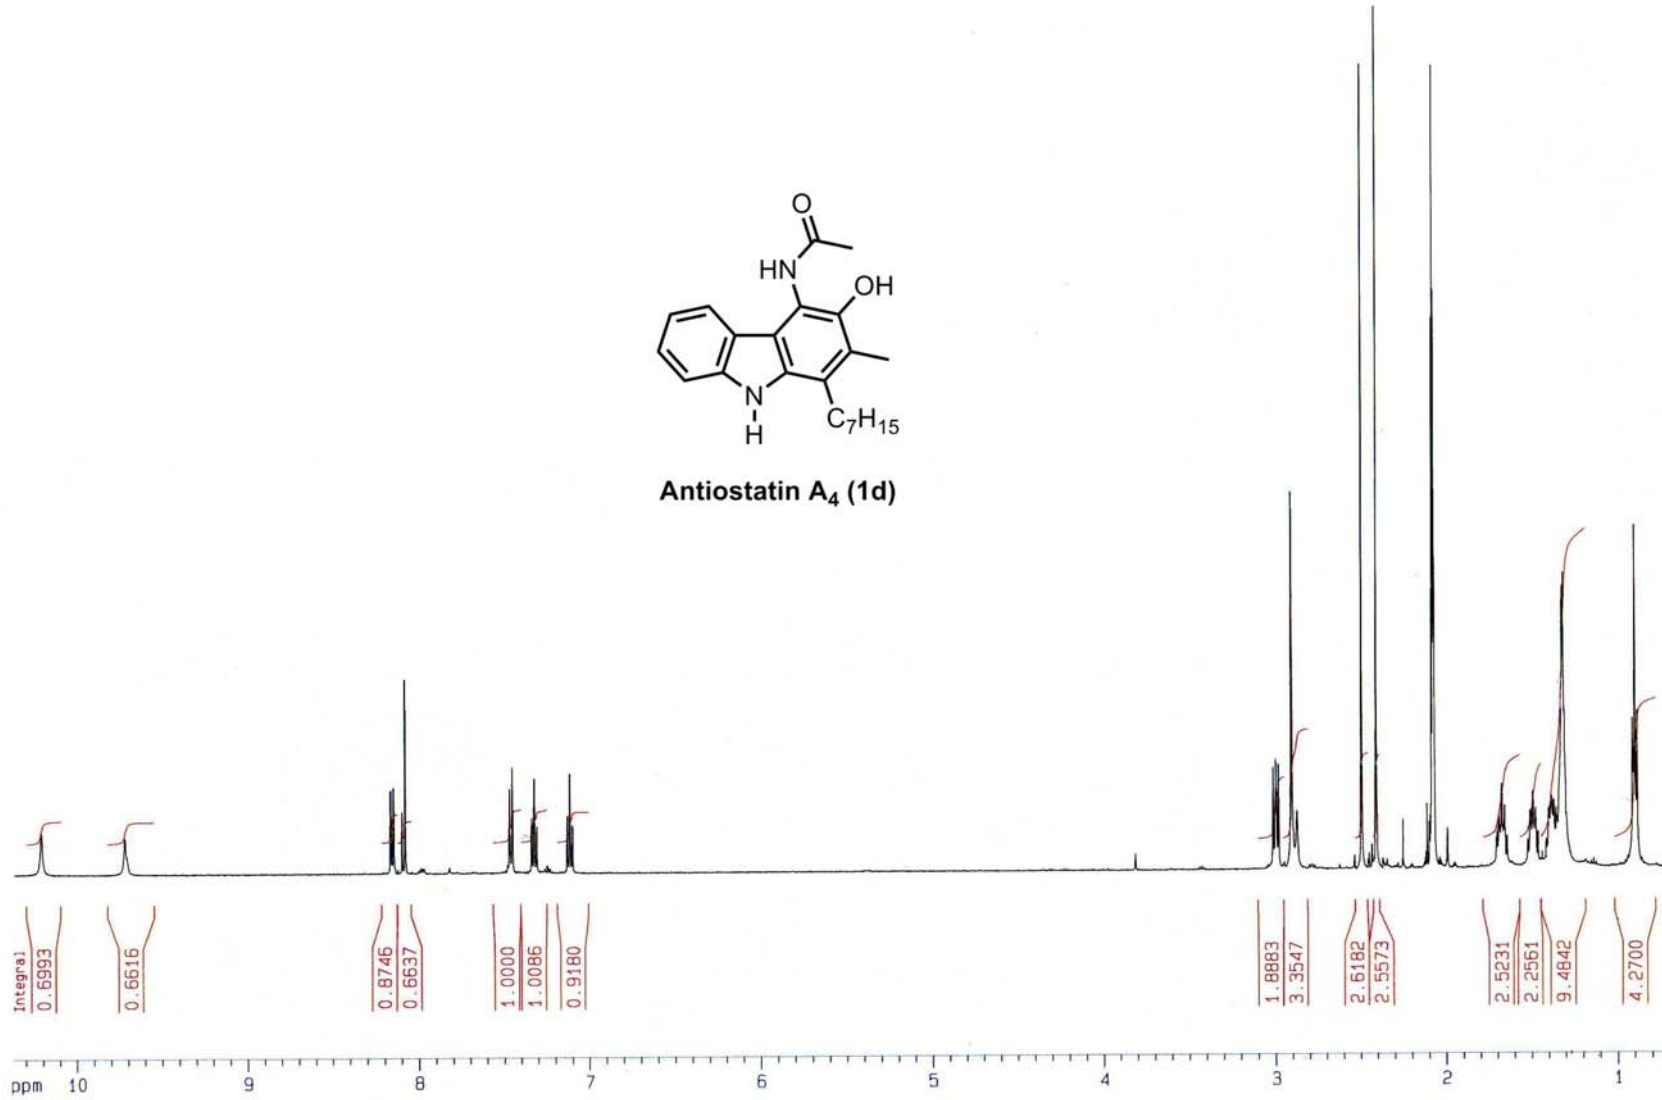



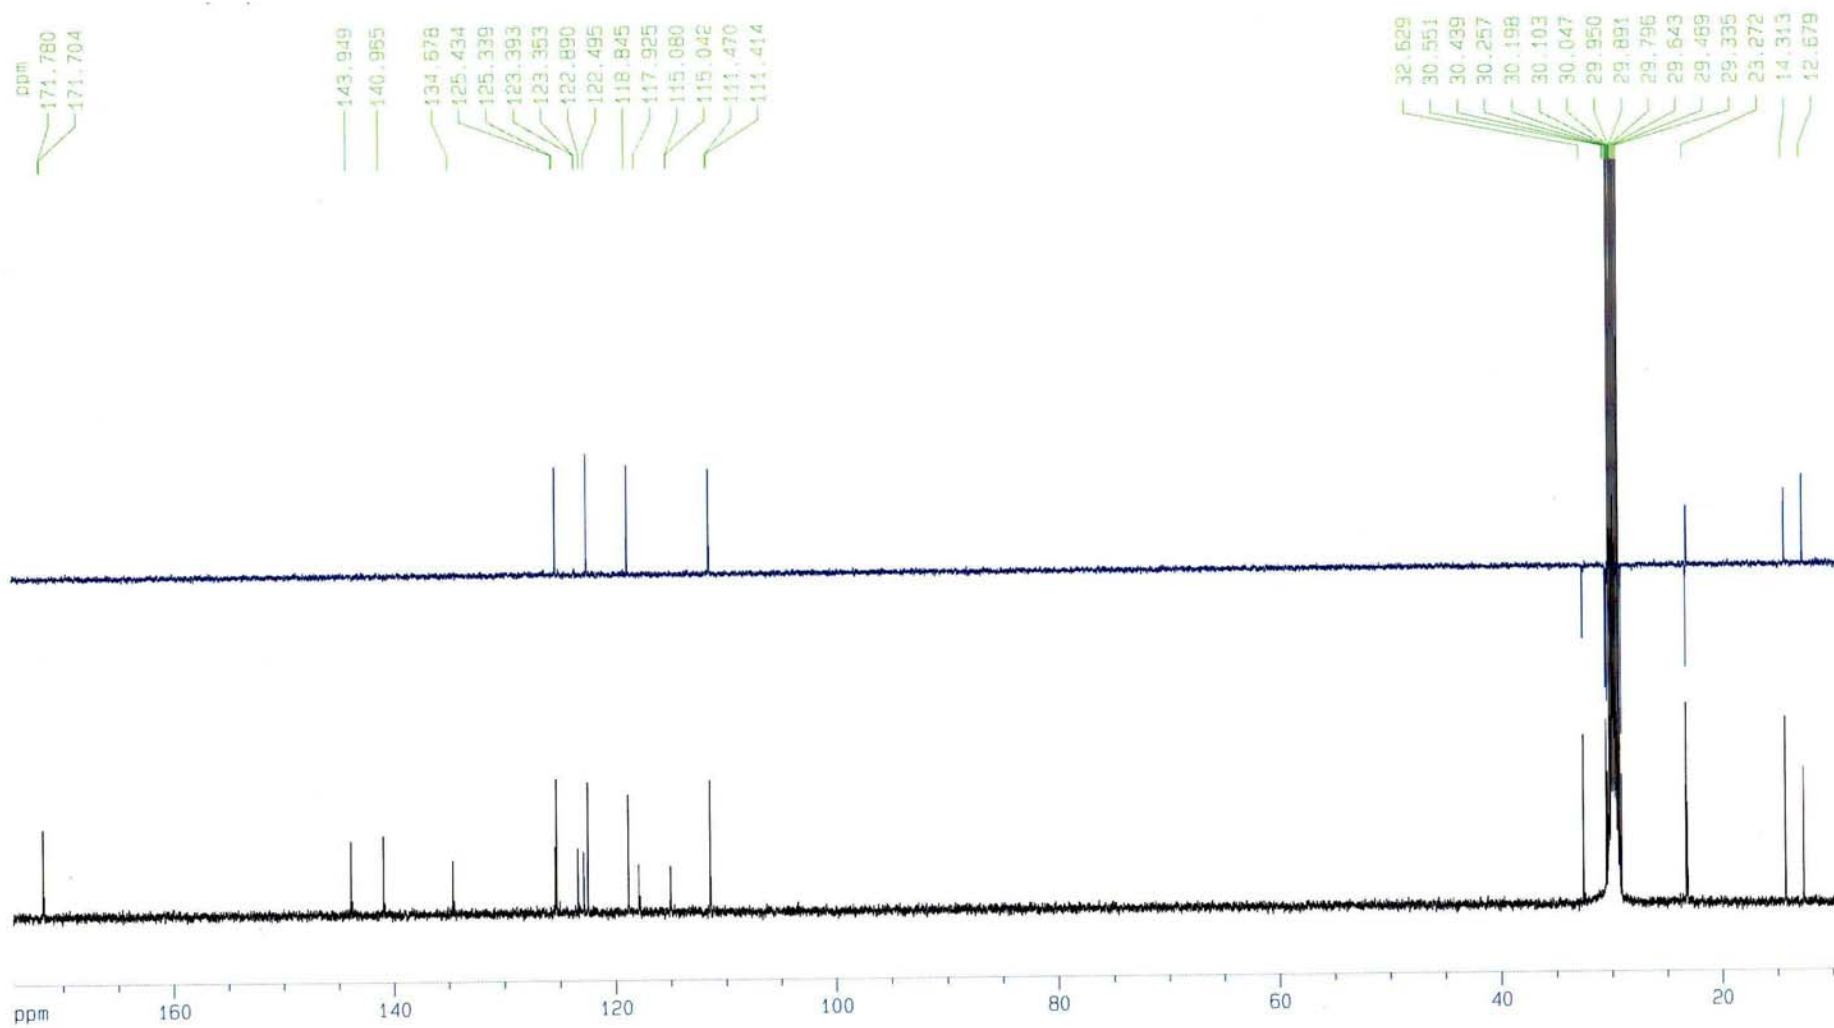

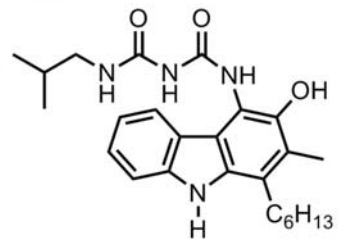

Antiostatins B<sub>2</sub> (2a)

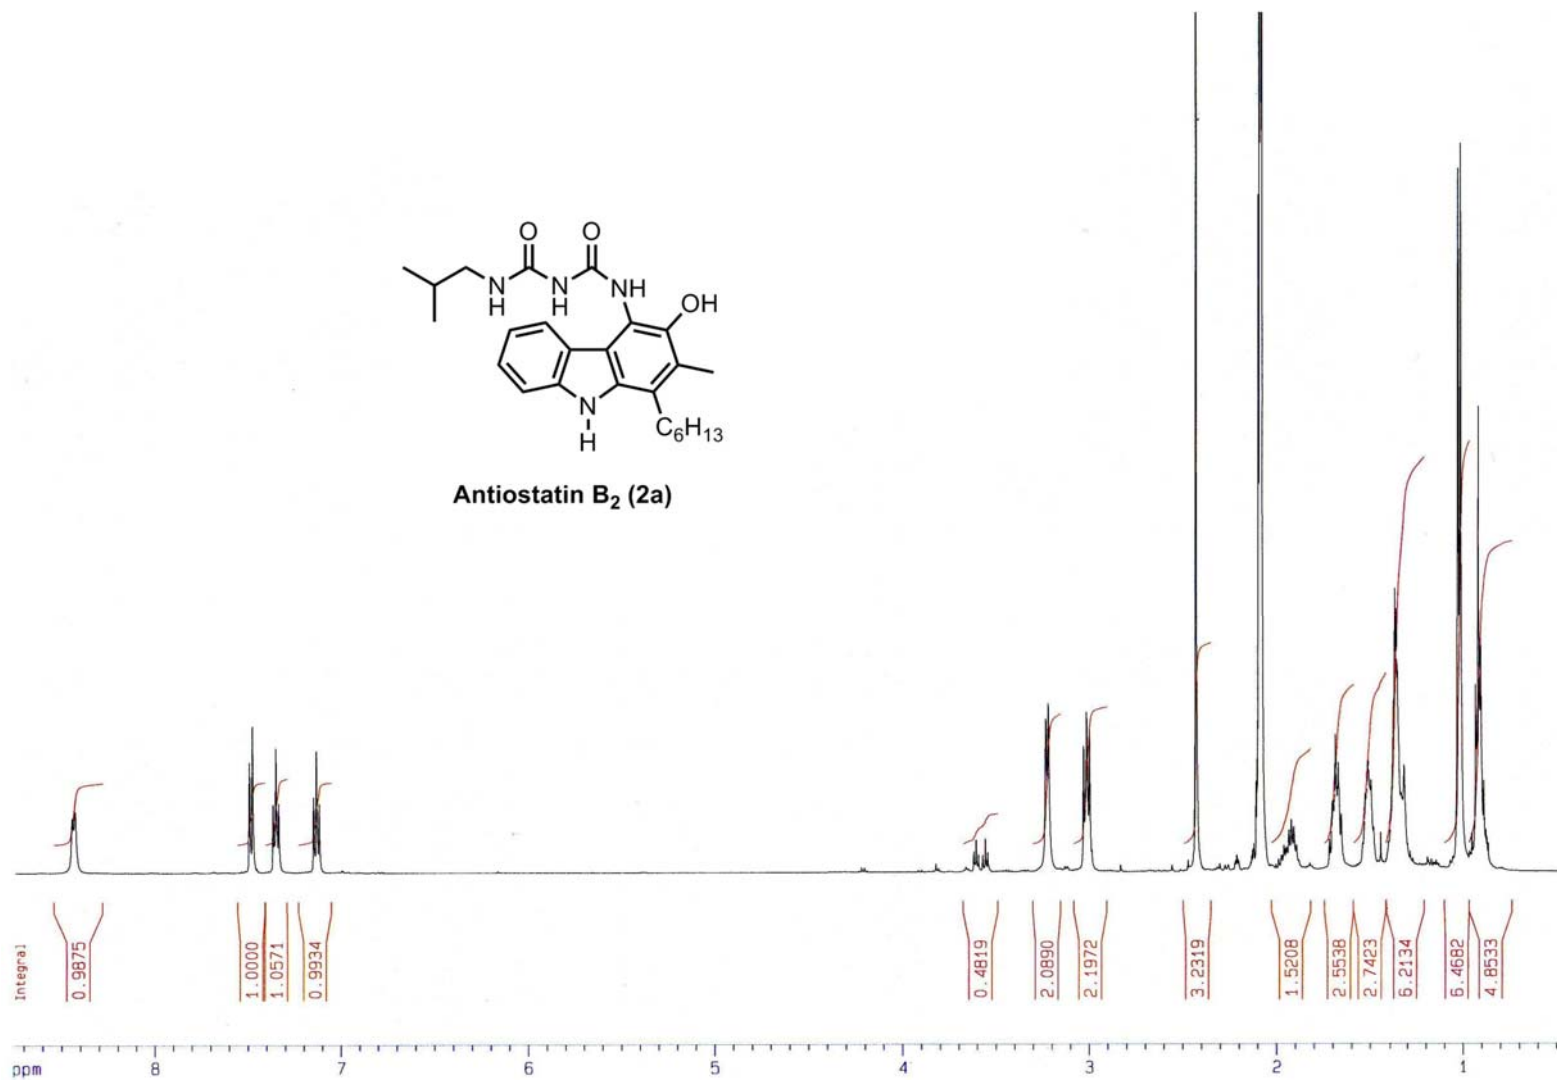

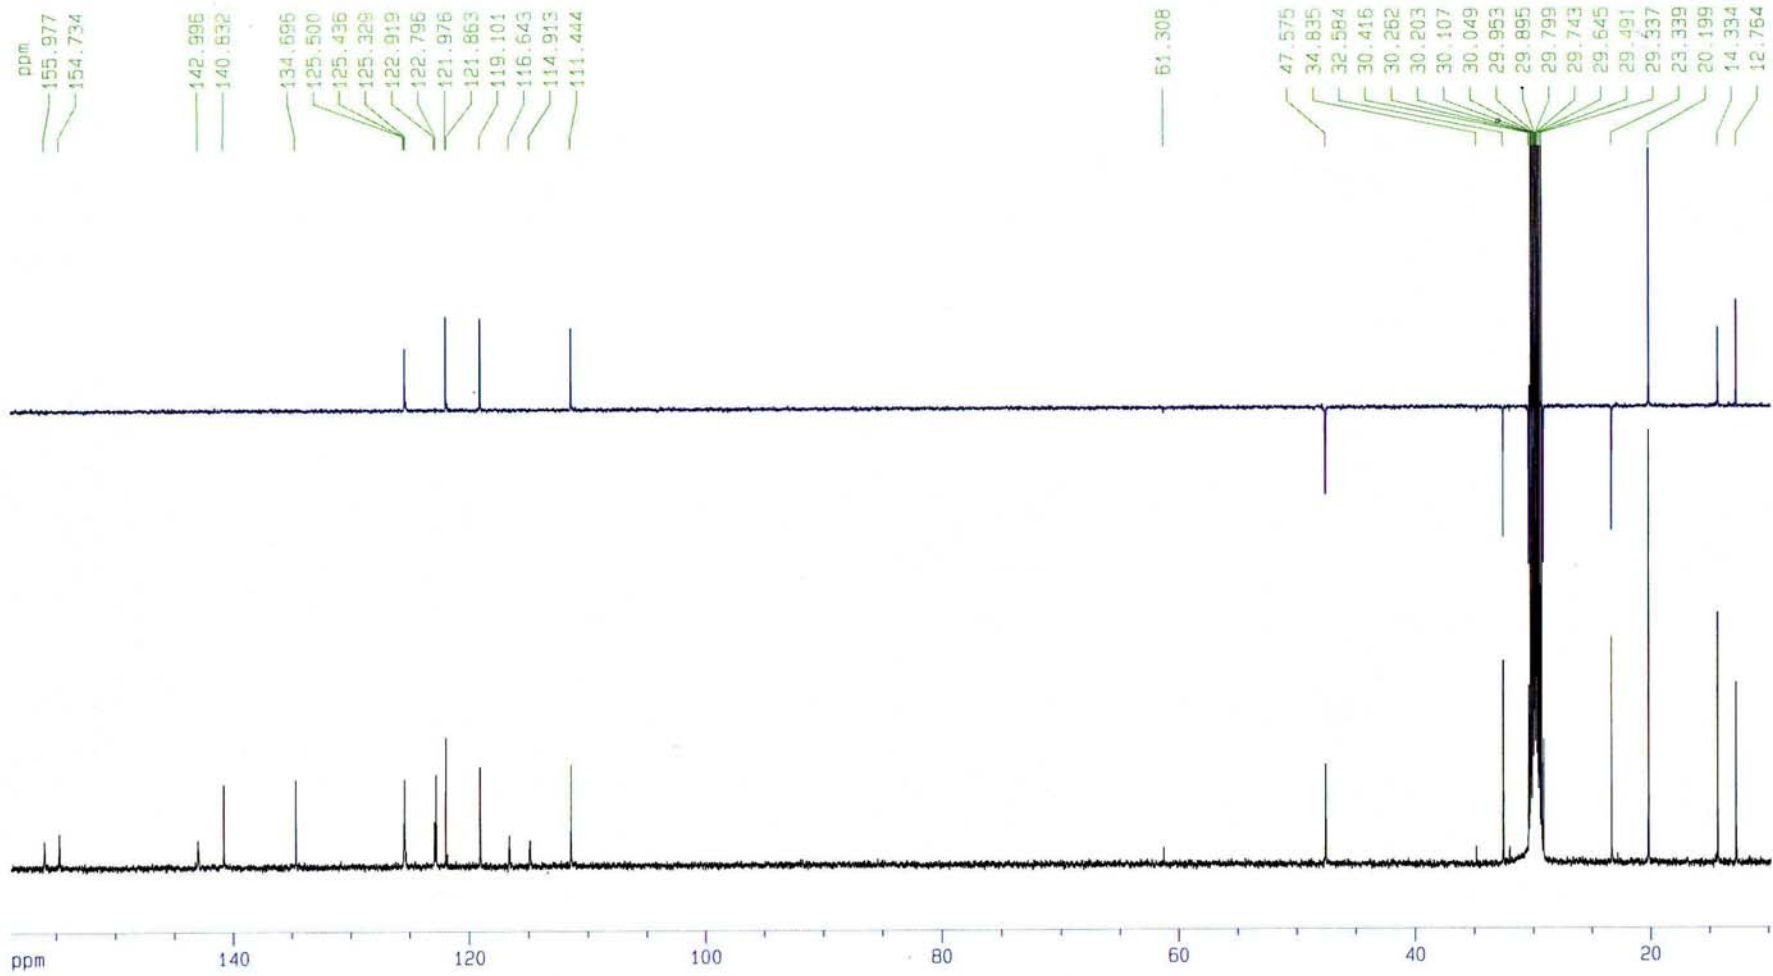

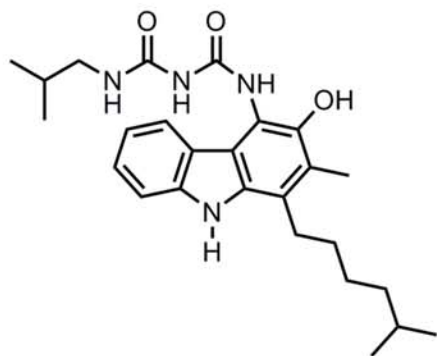

Antiostatin B<sub>3</sub> (2b)

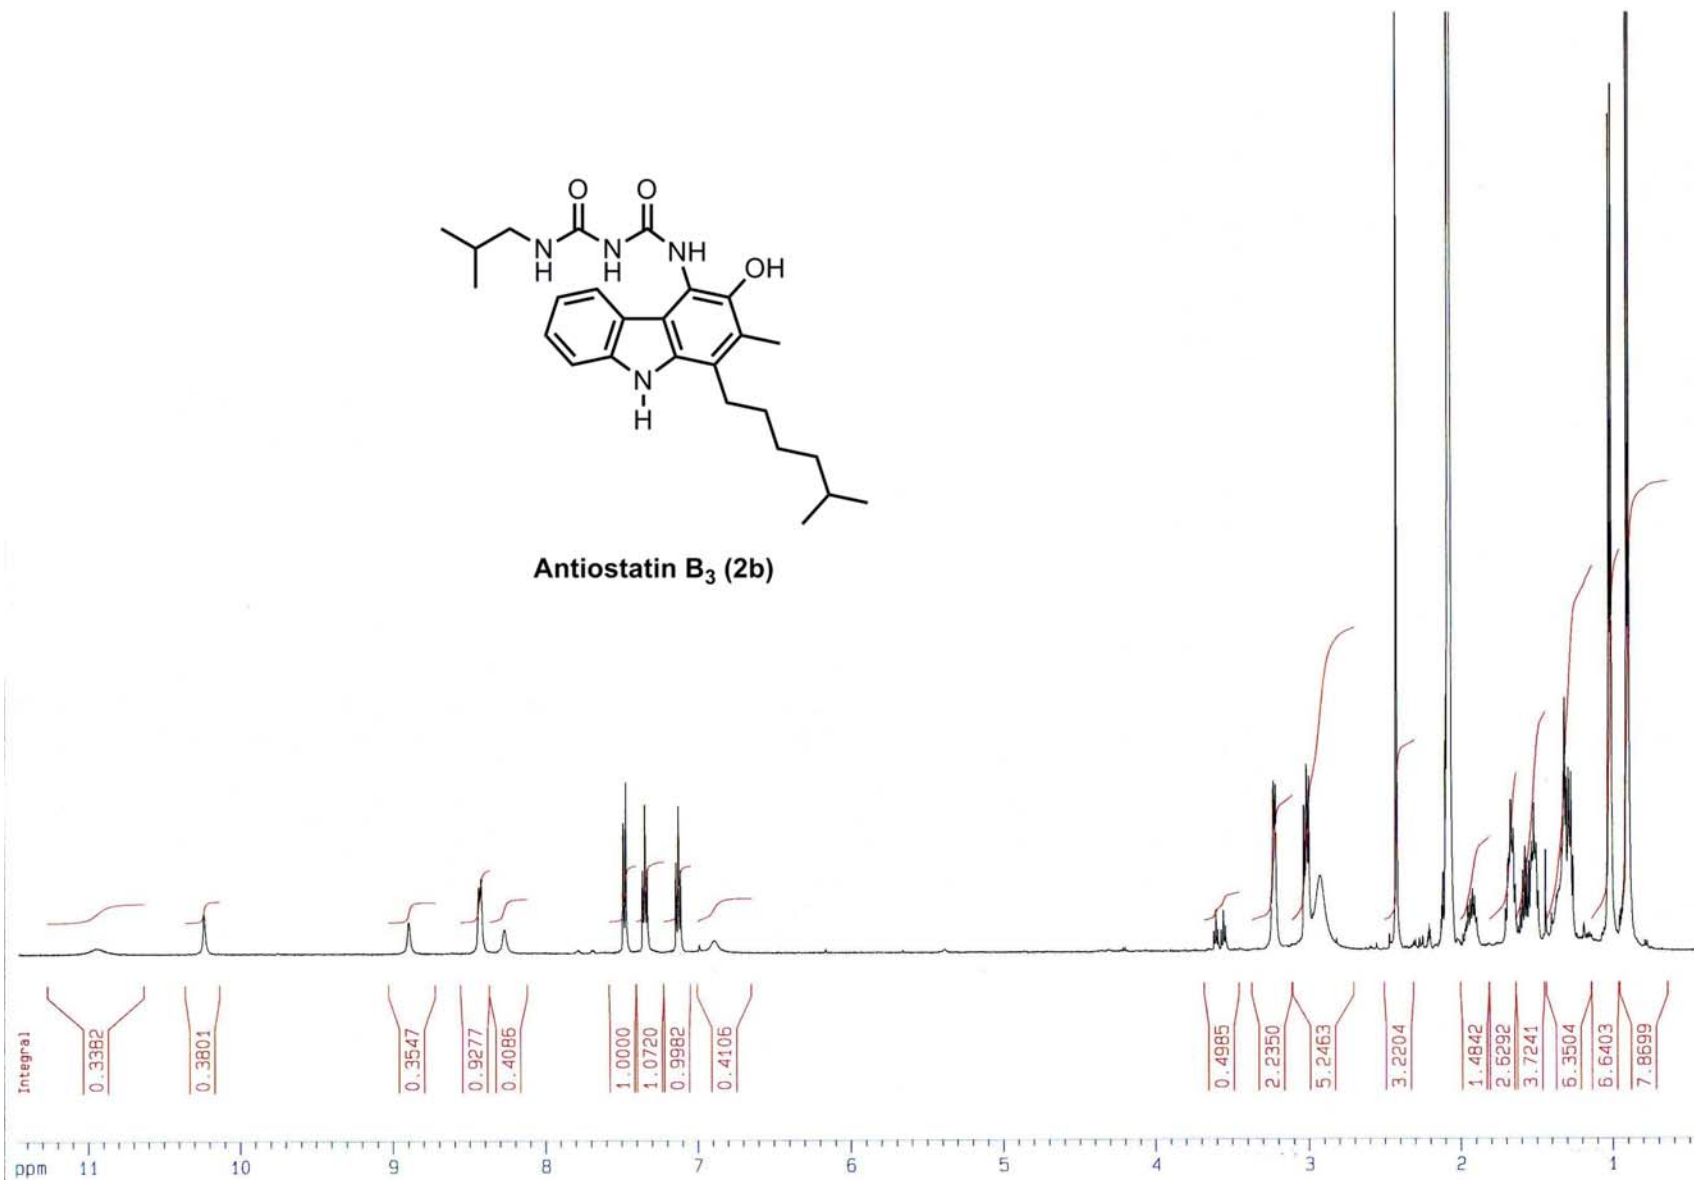

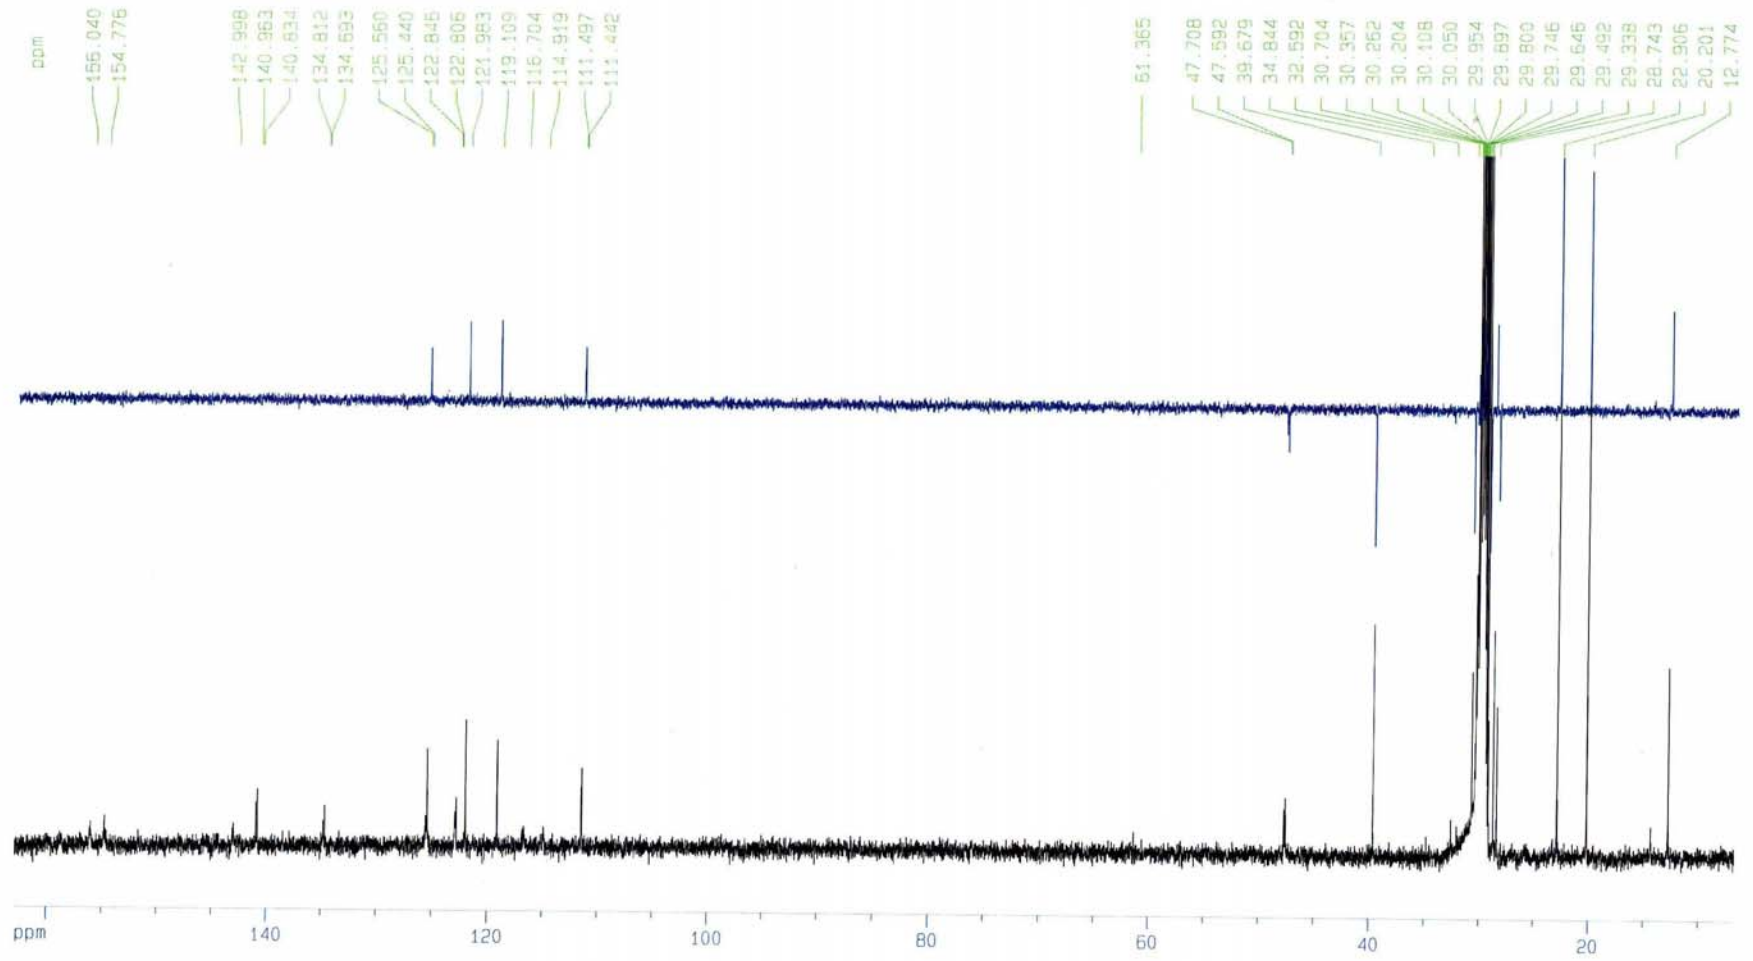

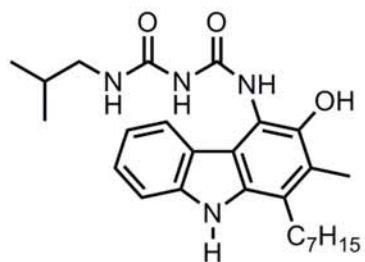

Antiostatin B<sub>4</sub> (2c)

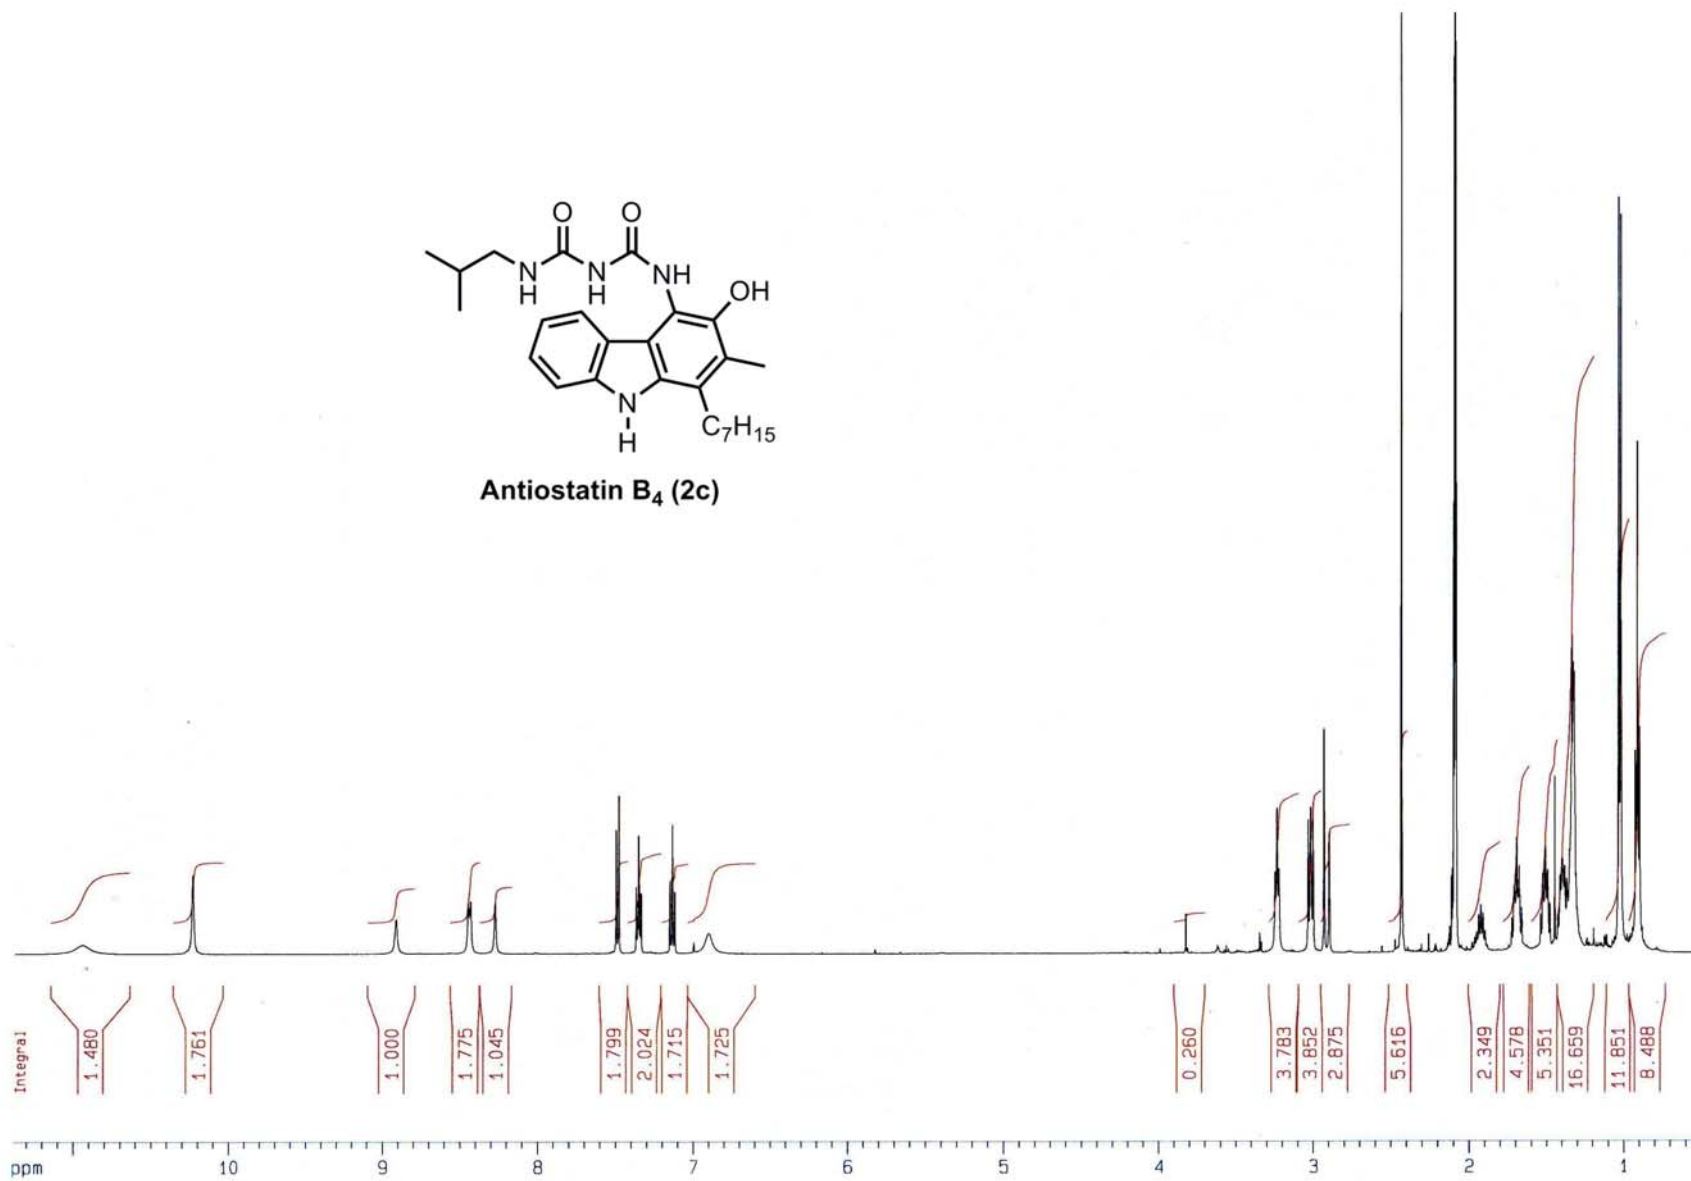

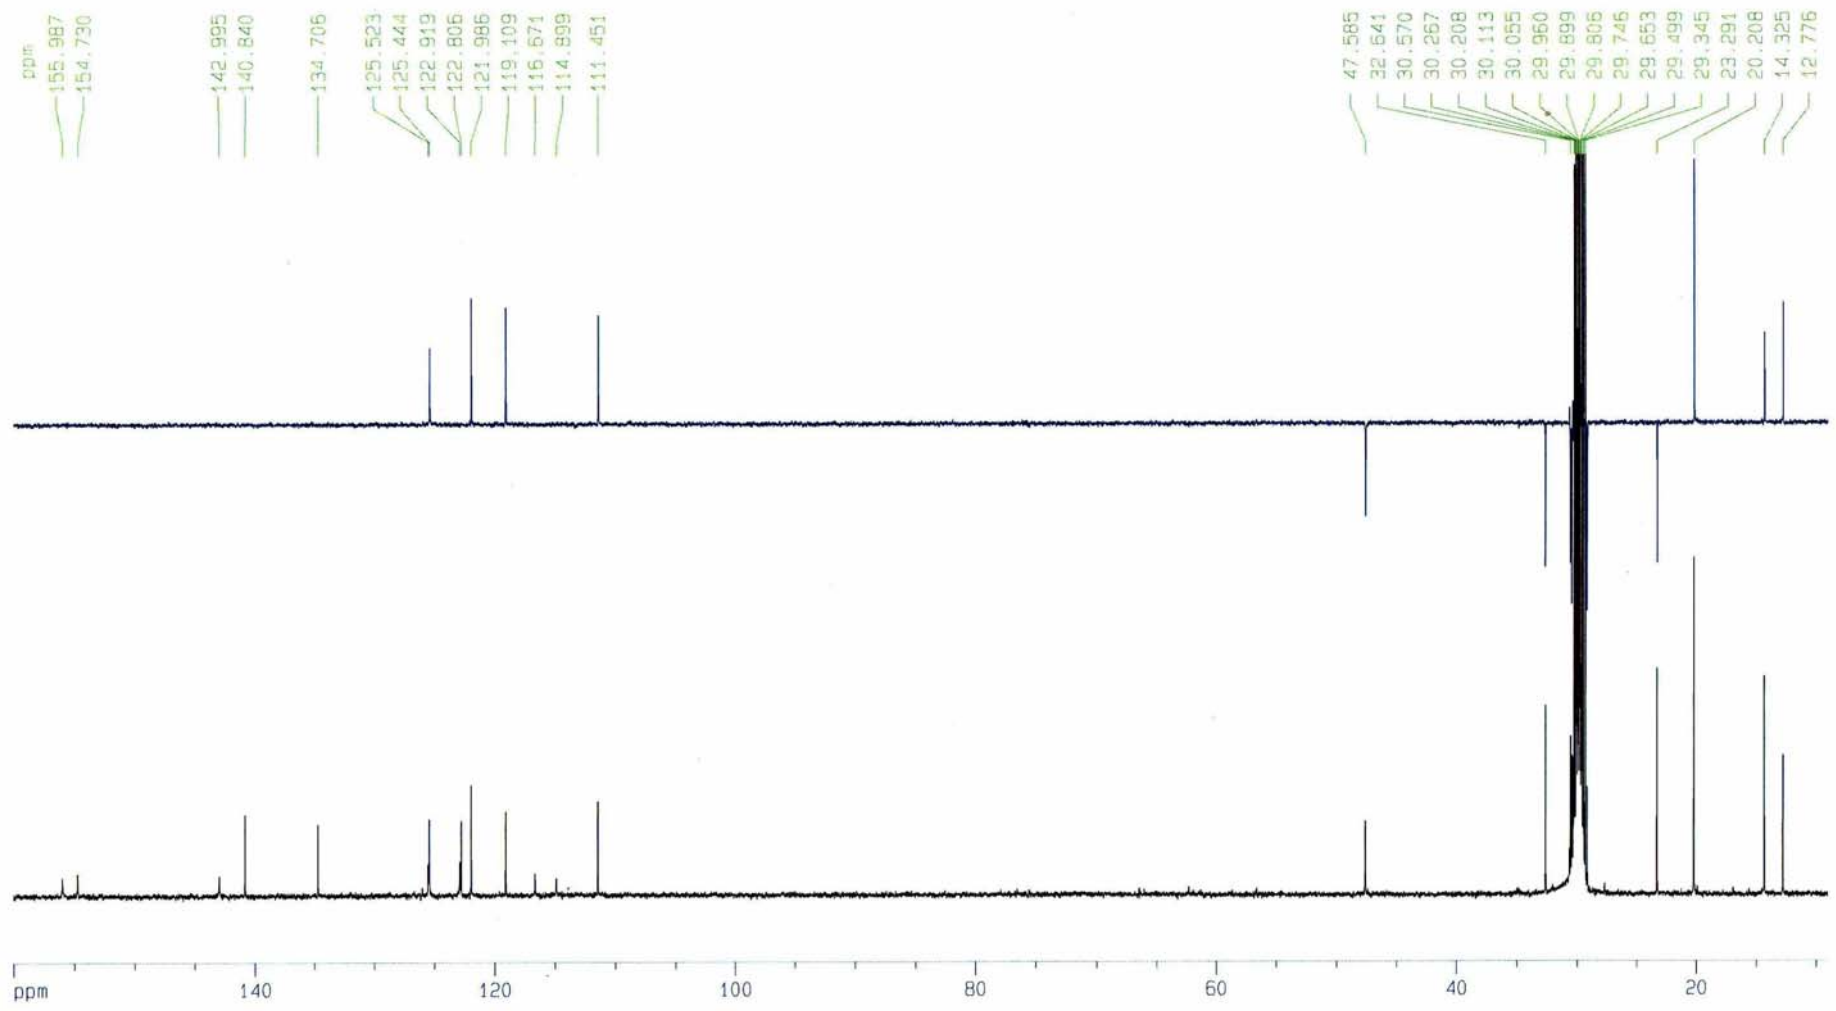

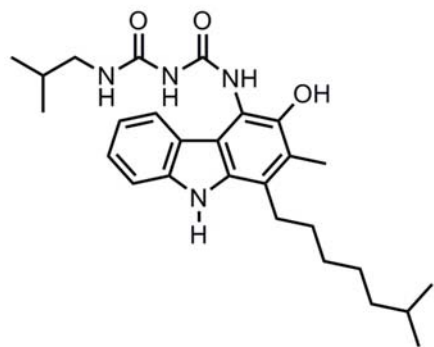

Antiostatin B<sub>5</sub> (2d)

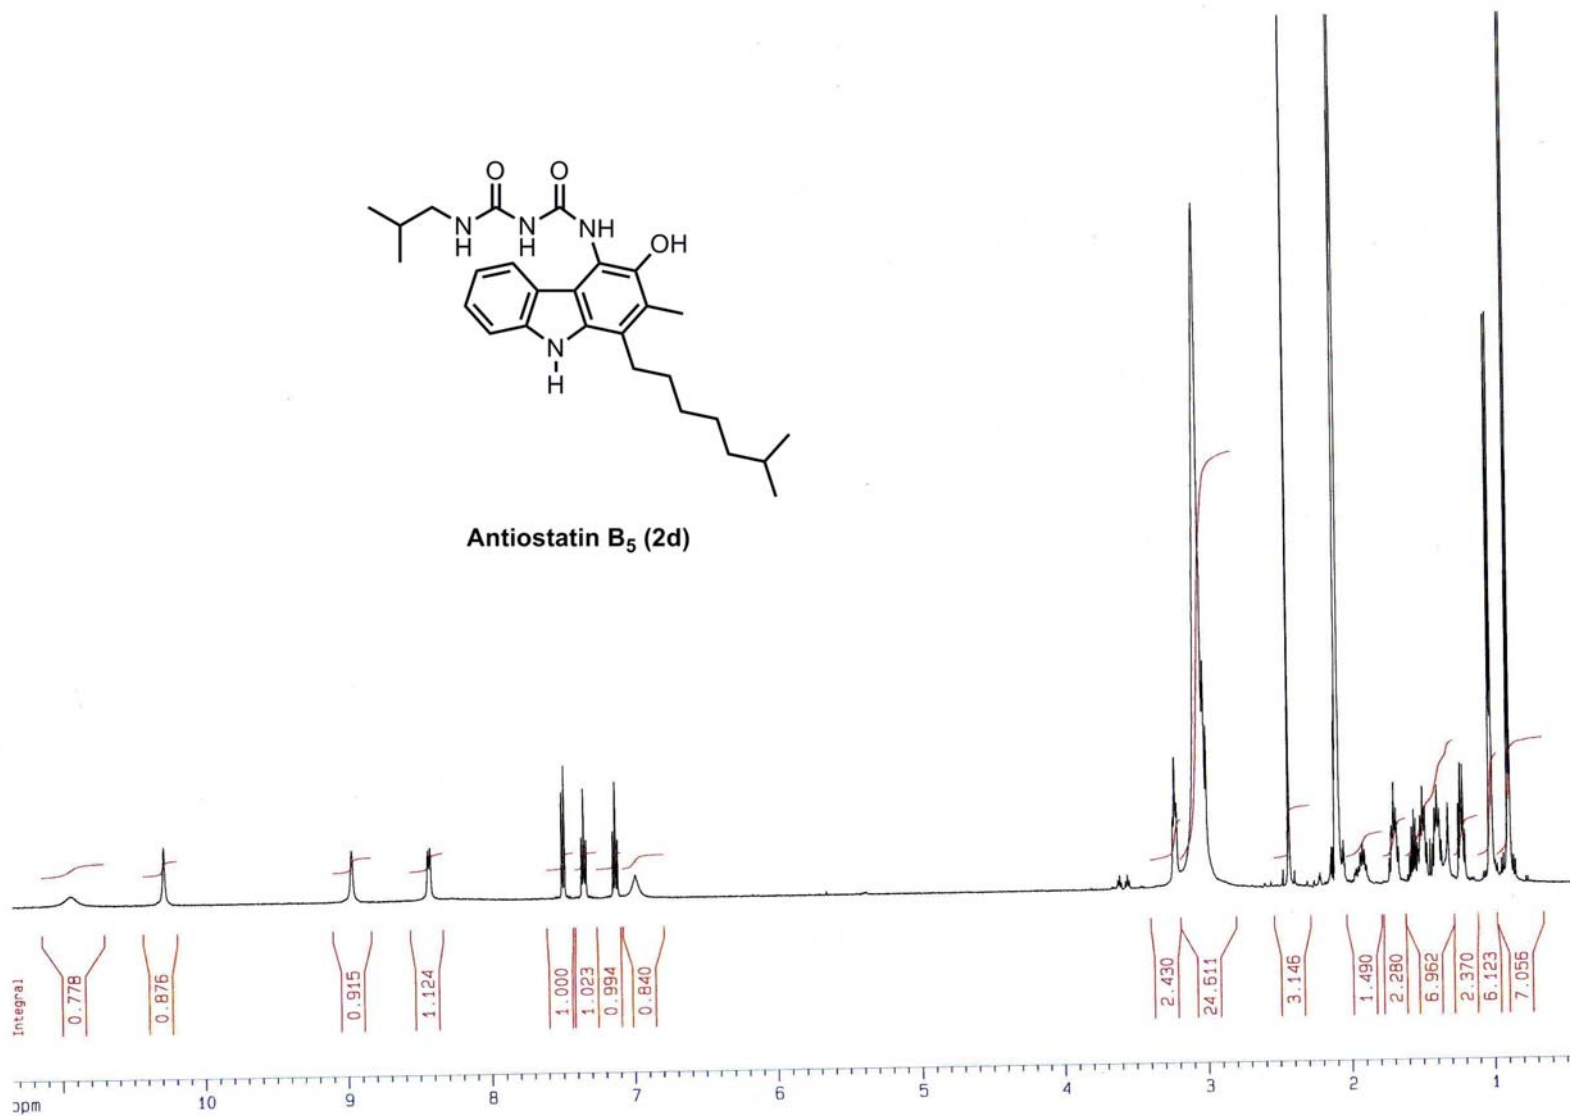



ppm  
156.195  
154.884  
143.123  
140.966  
134.804  
126.491  
125.403  
122.961  
122.834  
121.958  
119.079  
116.782  
114.996  
111.505

47.690  
39.757  
30.810  
30.261  
30.203  
30.107  
30.046  
29.953  
29.894  
29.799  
29.741  
29.645  
29.491  
29.337  
28.618  
28.125  
22.875  
20.193  
12.776

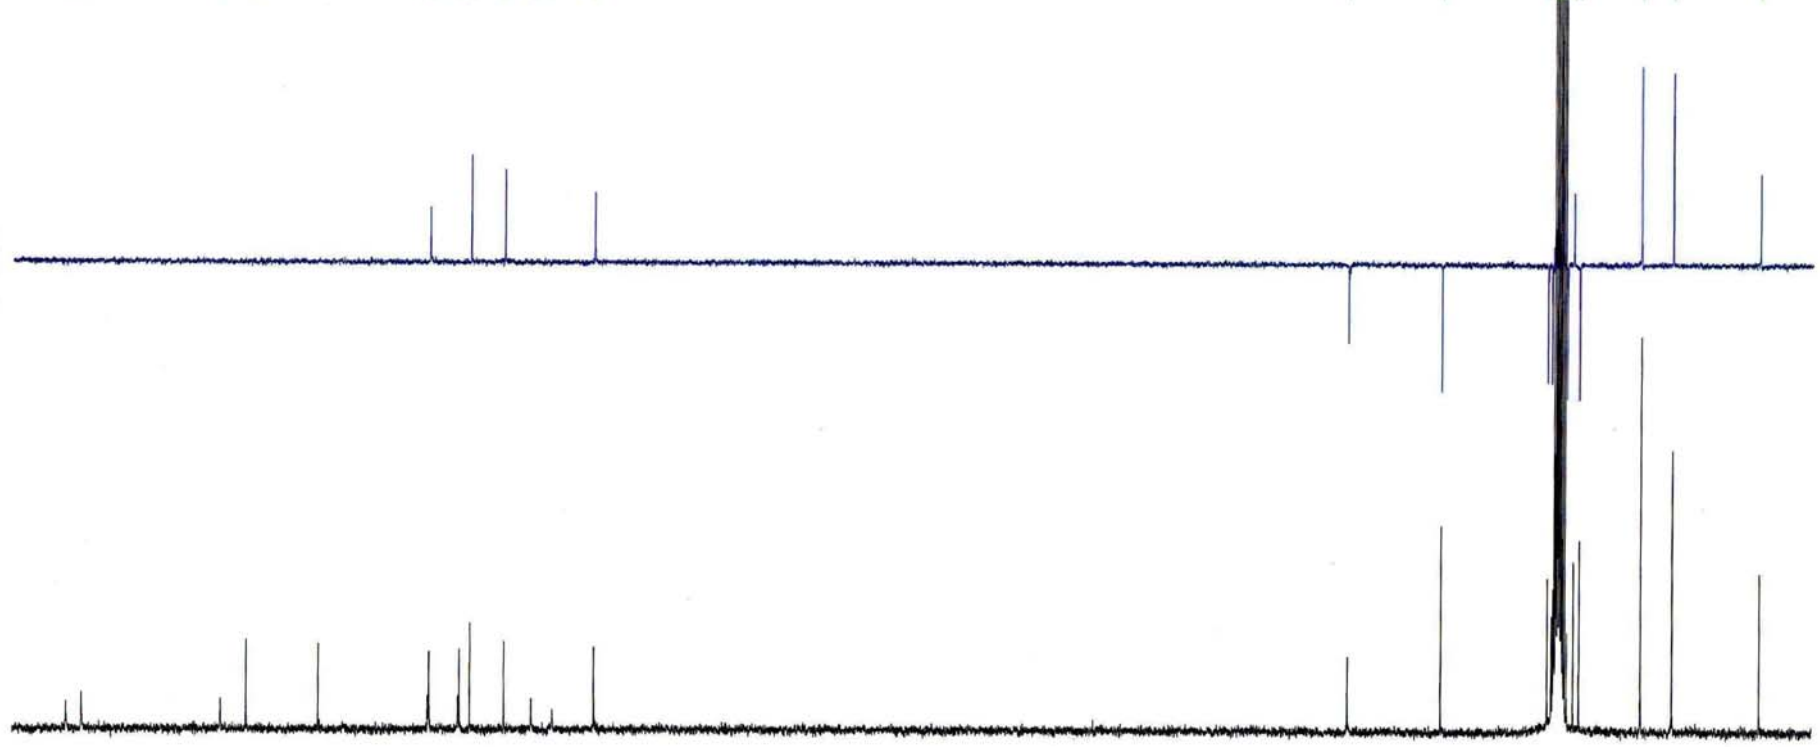

ppm 140 120 100 80 60 40 20
