# Supplementary figures and images for: First total synthesis of the whole series of the antiostatins A and B
Source: Royal Society of Chemistry journal article supplement (doi:10.1039/b821039j), 2009-01-01

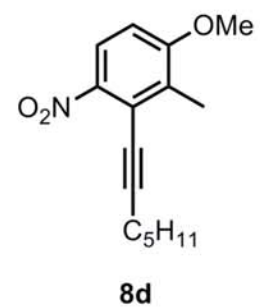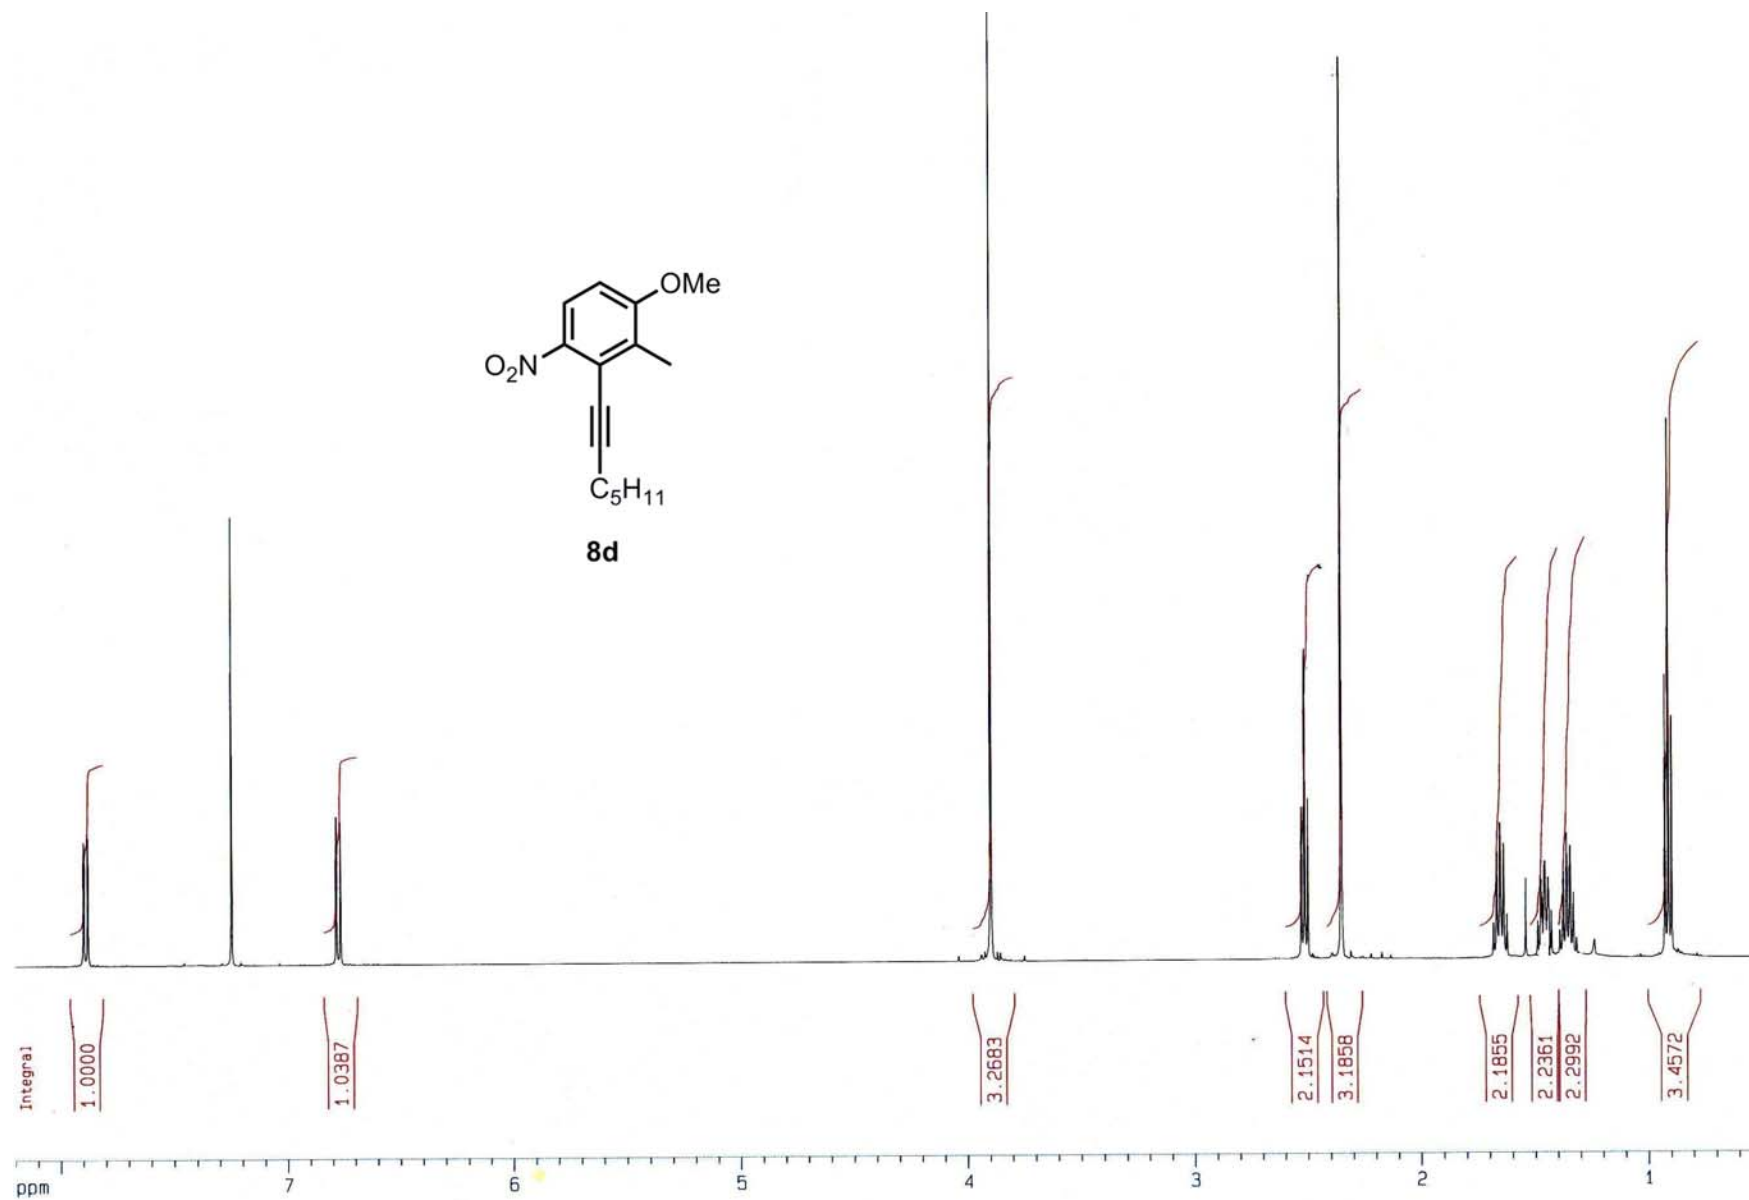

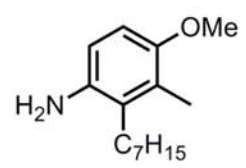

9d

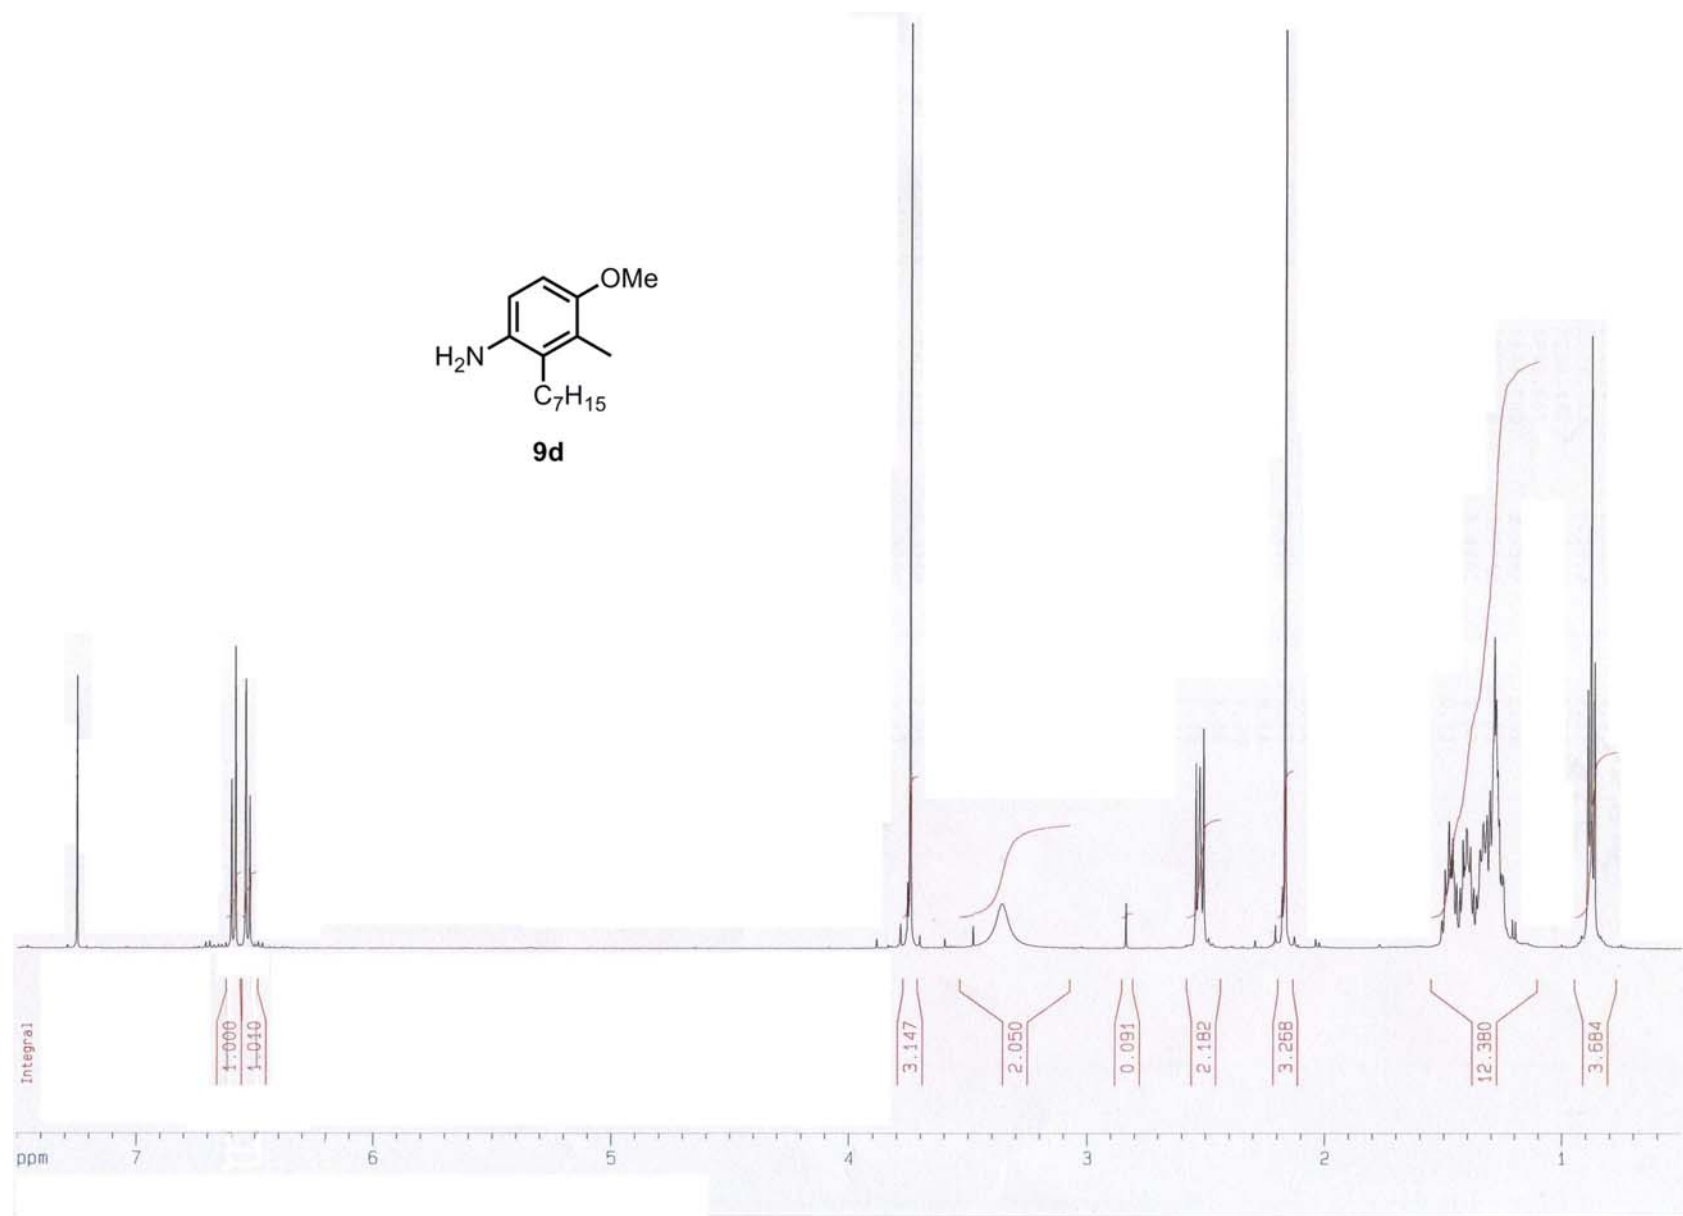

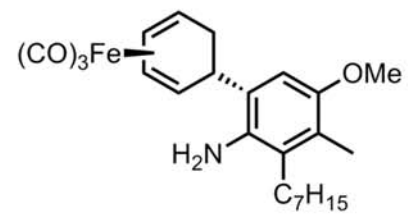

**11d**

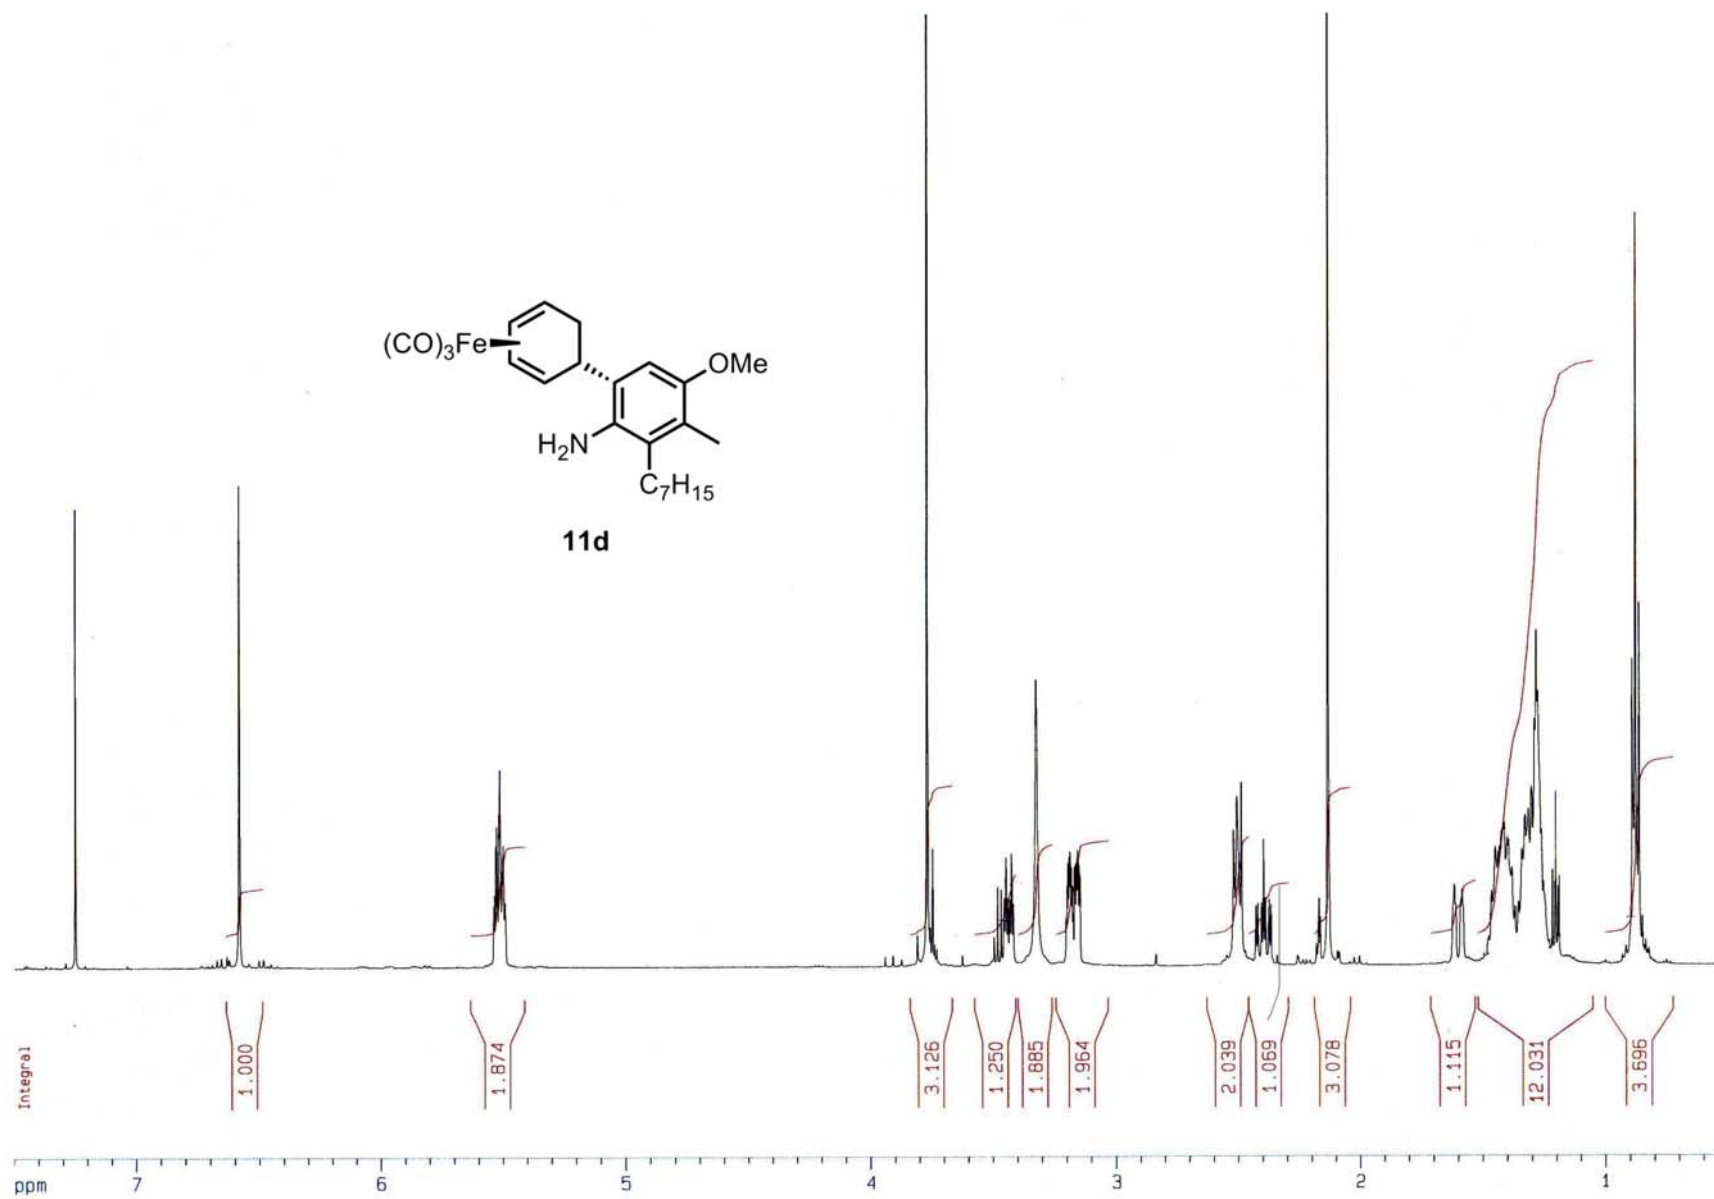

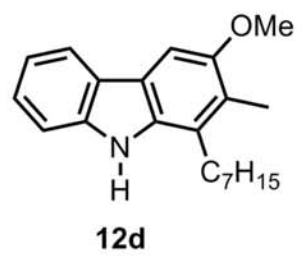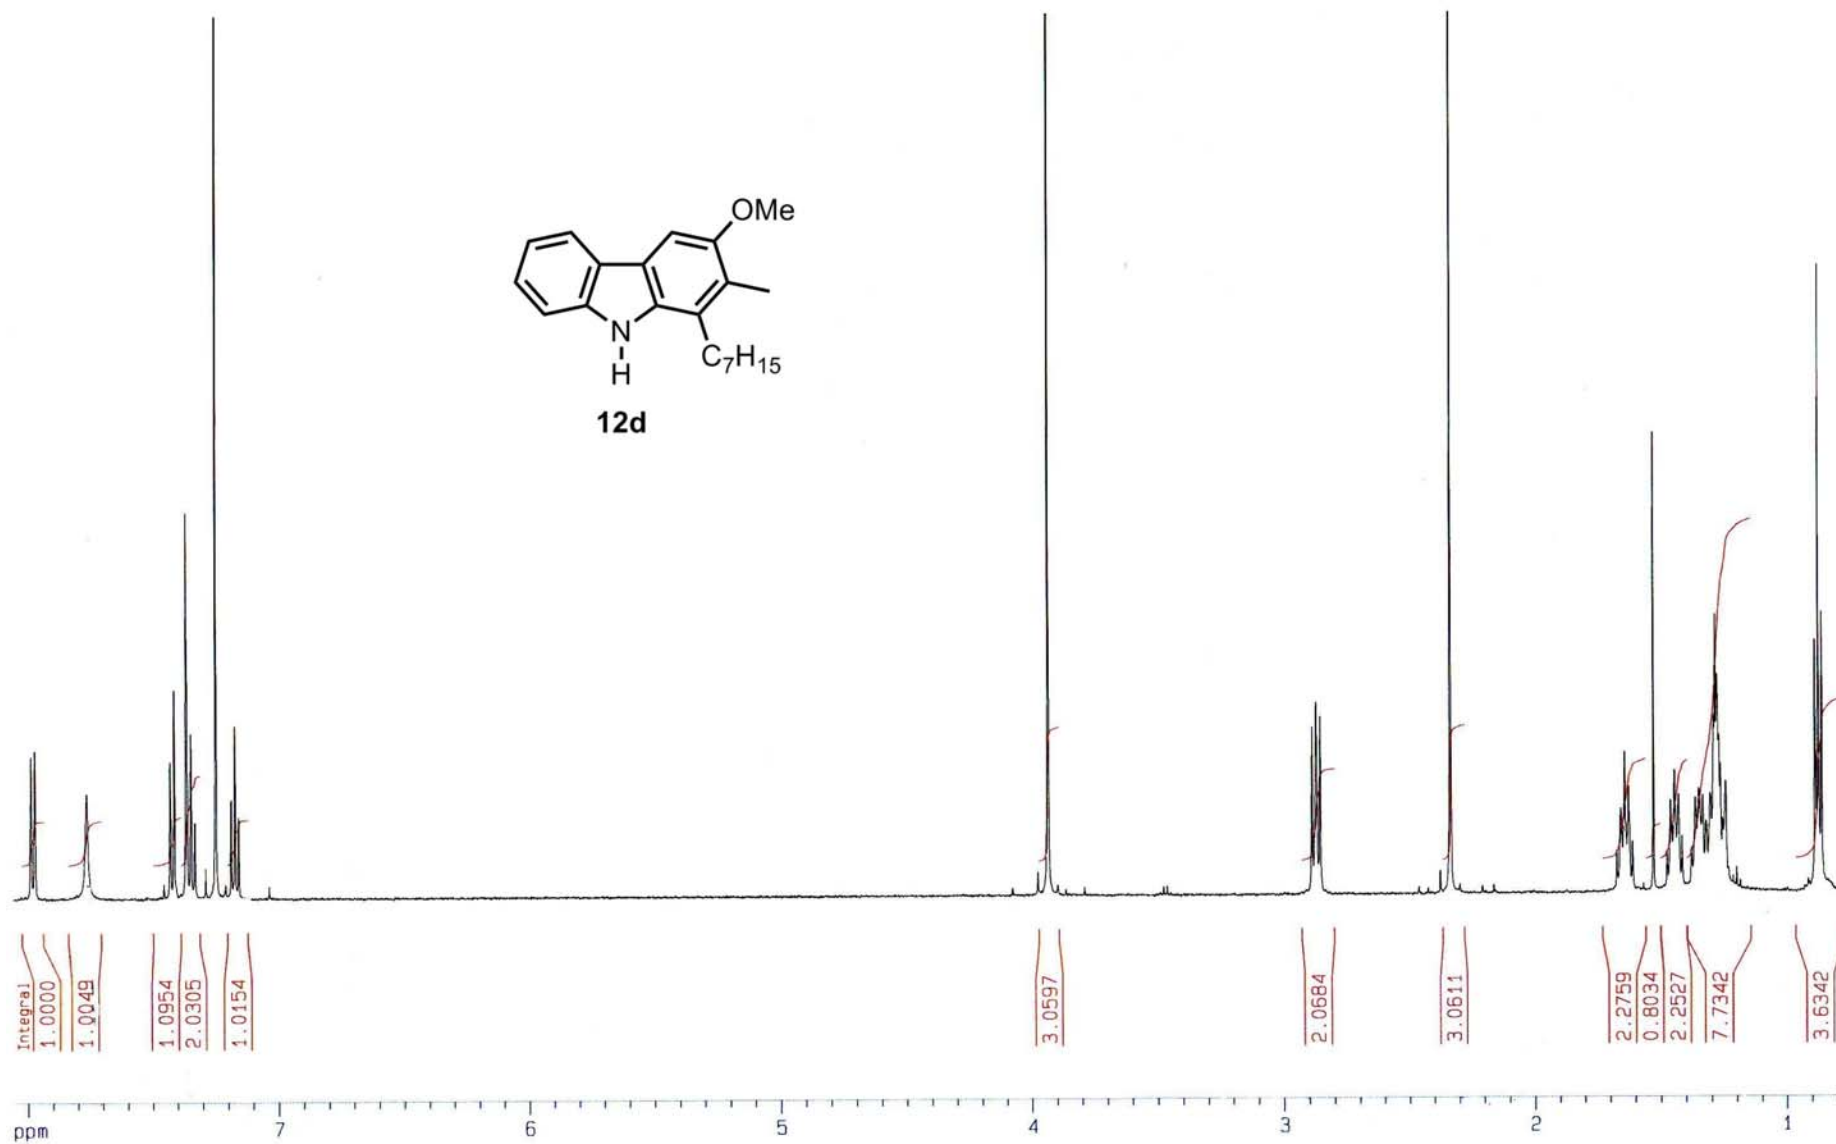

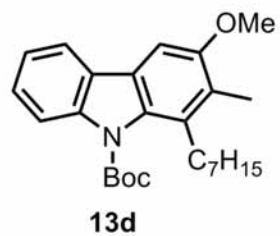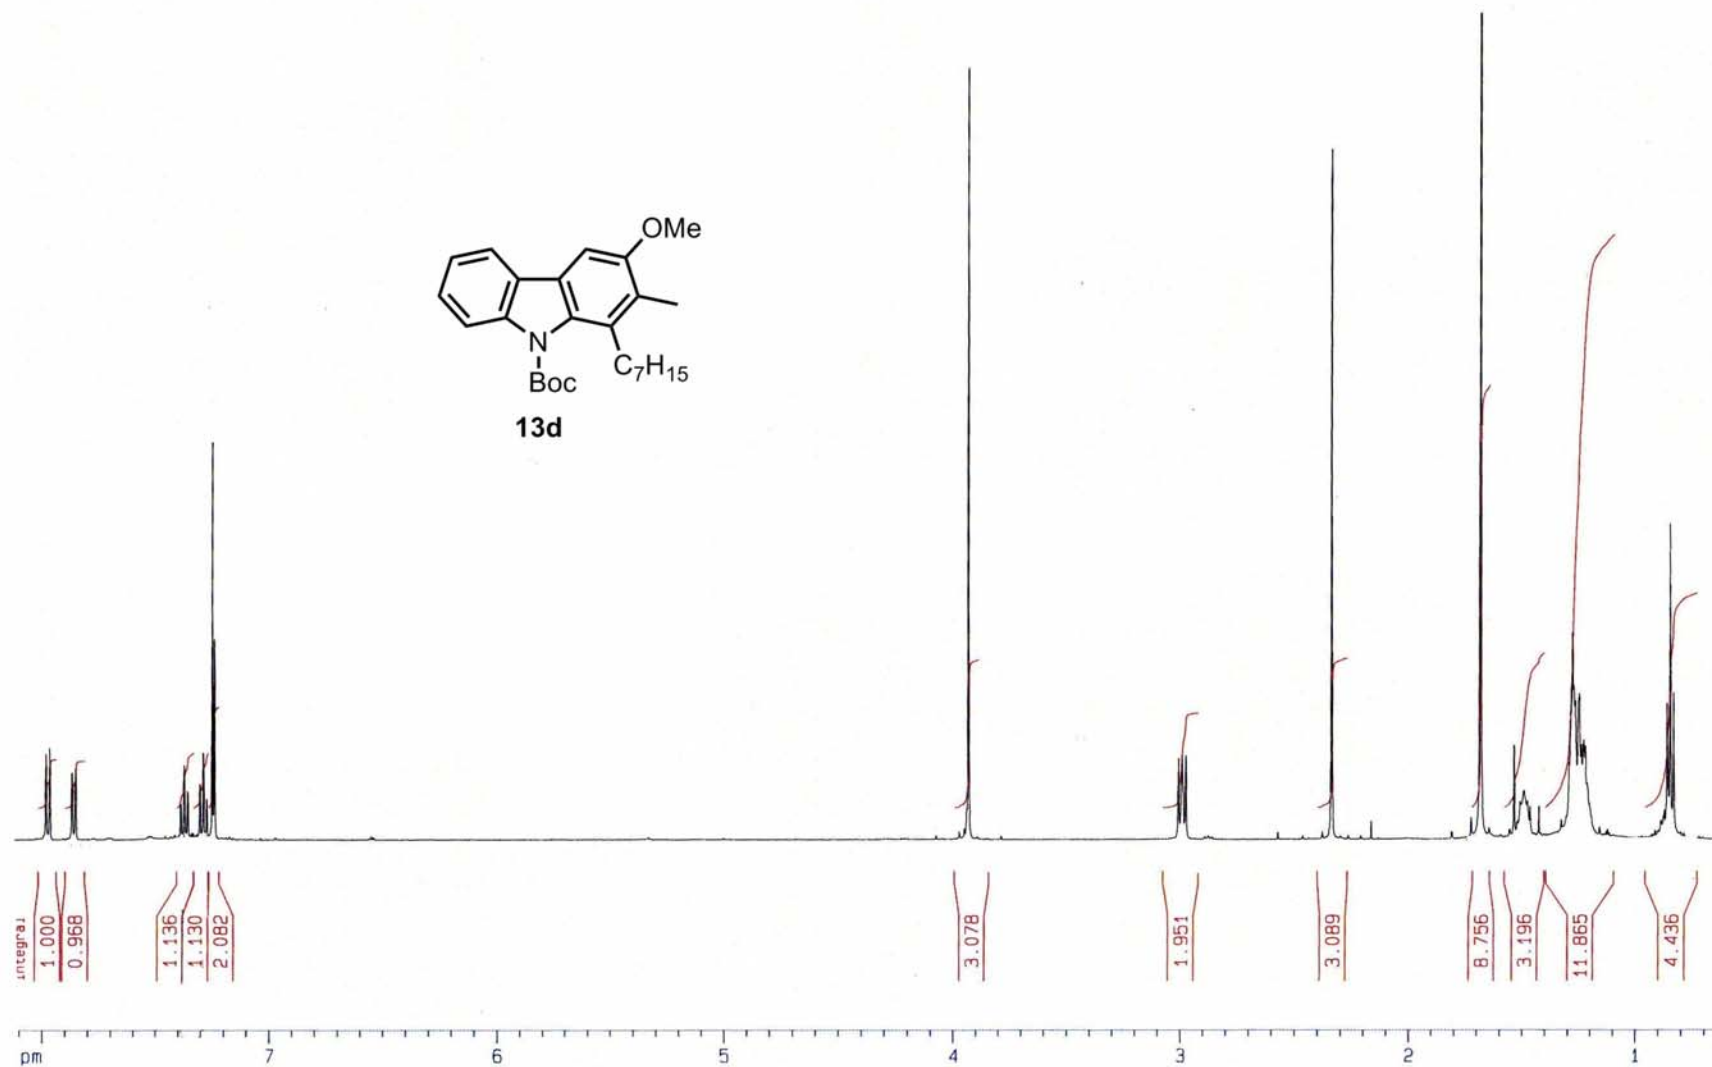

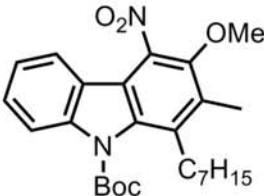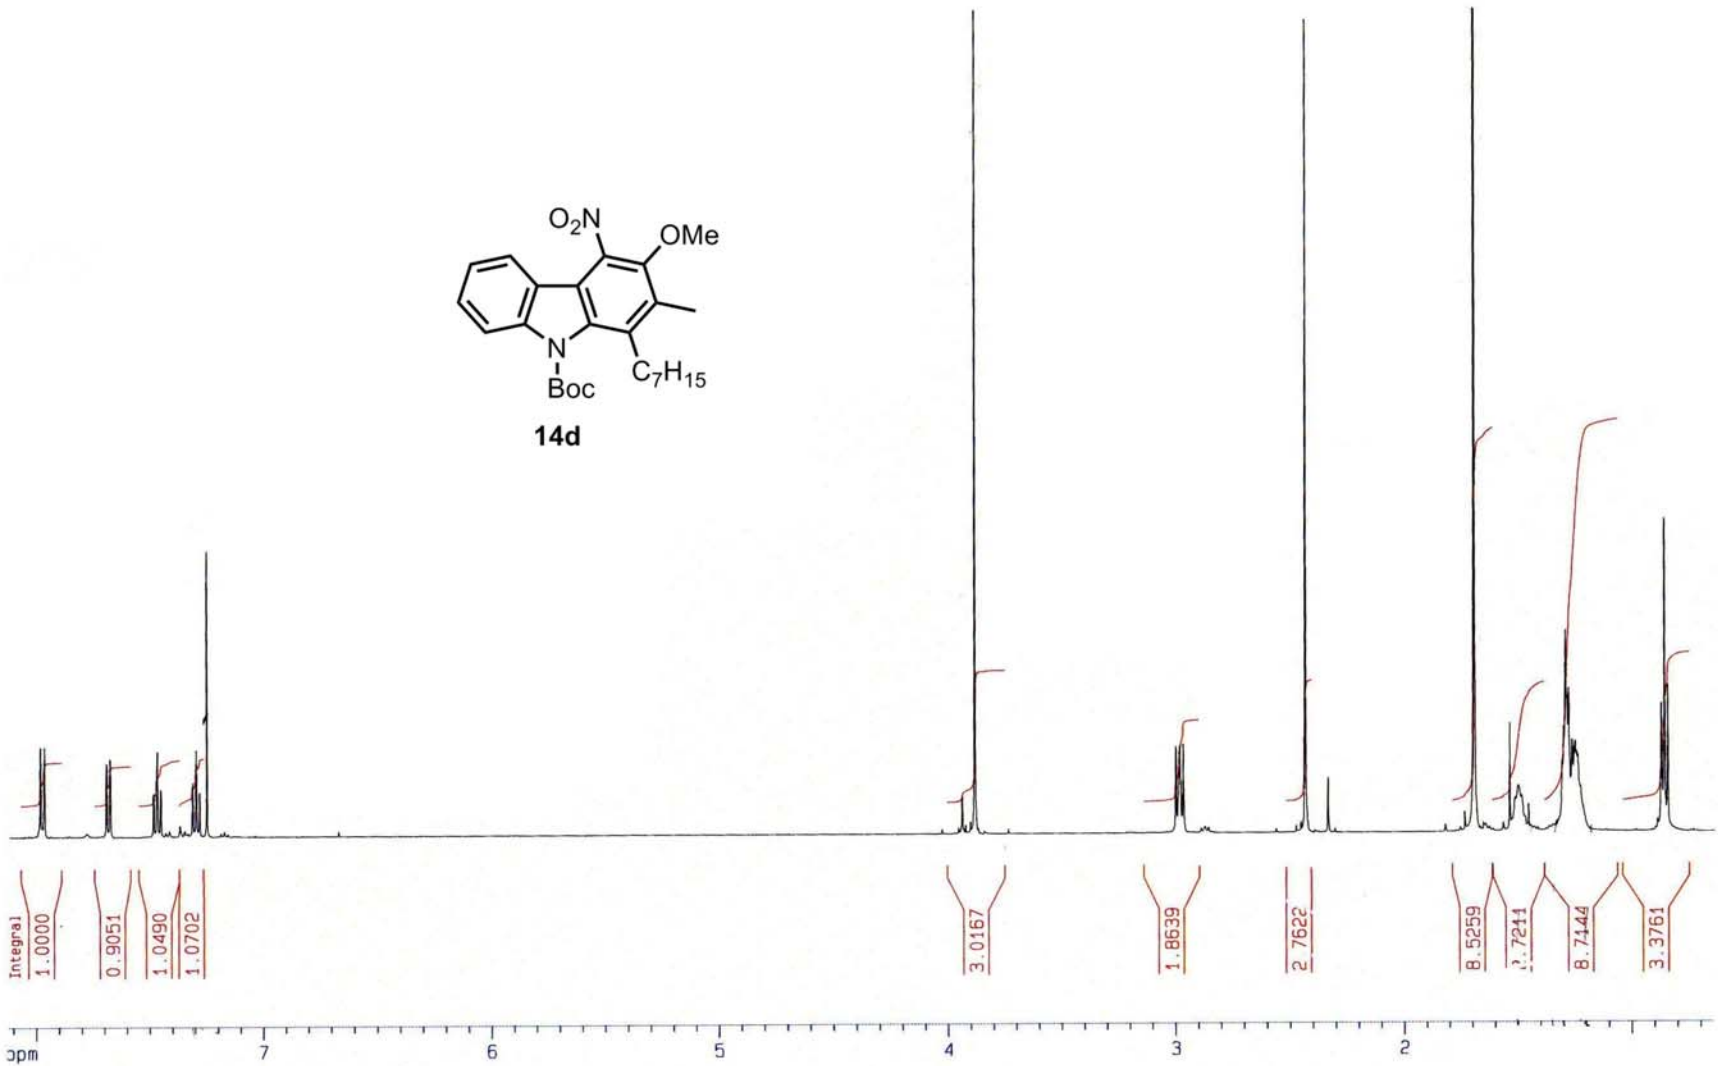

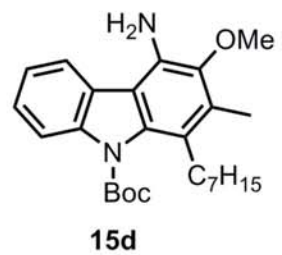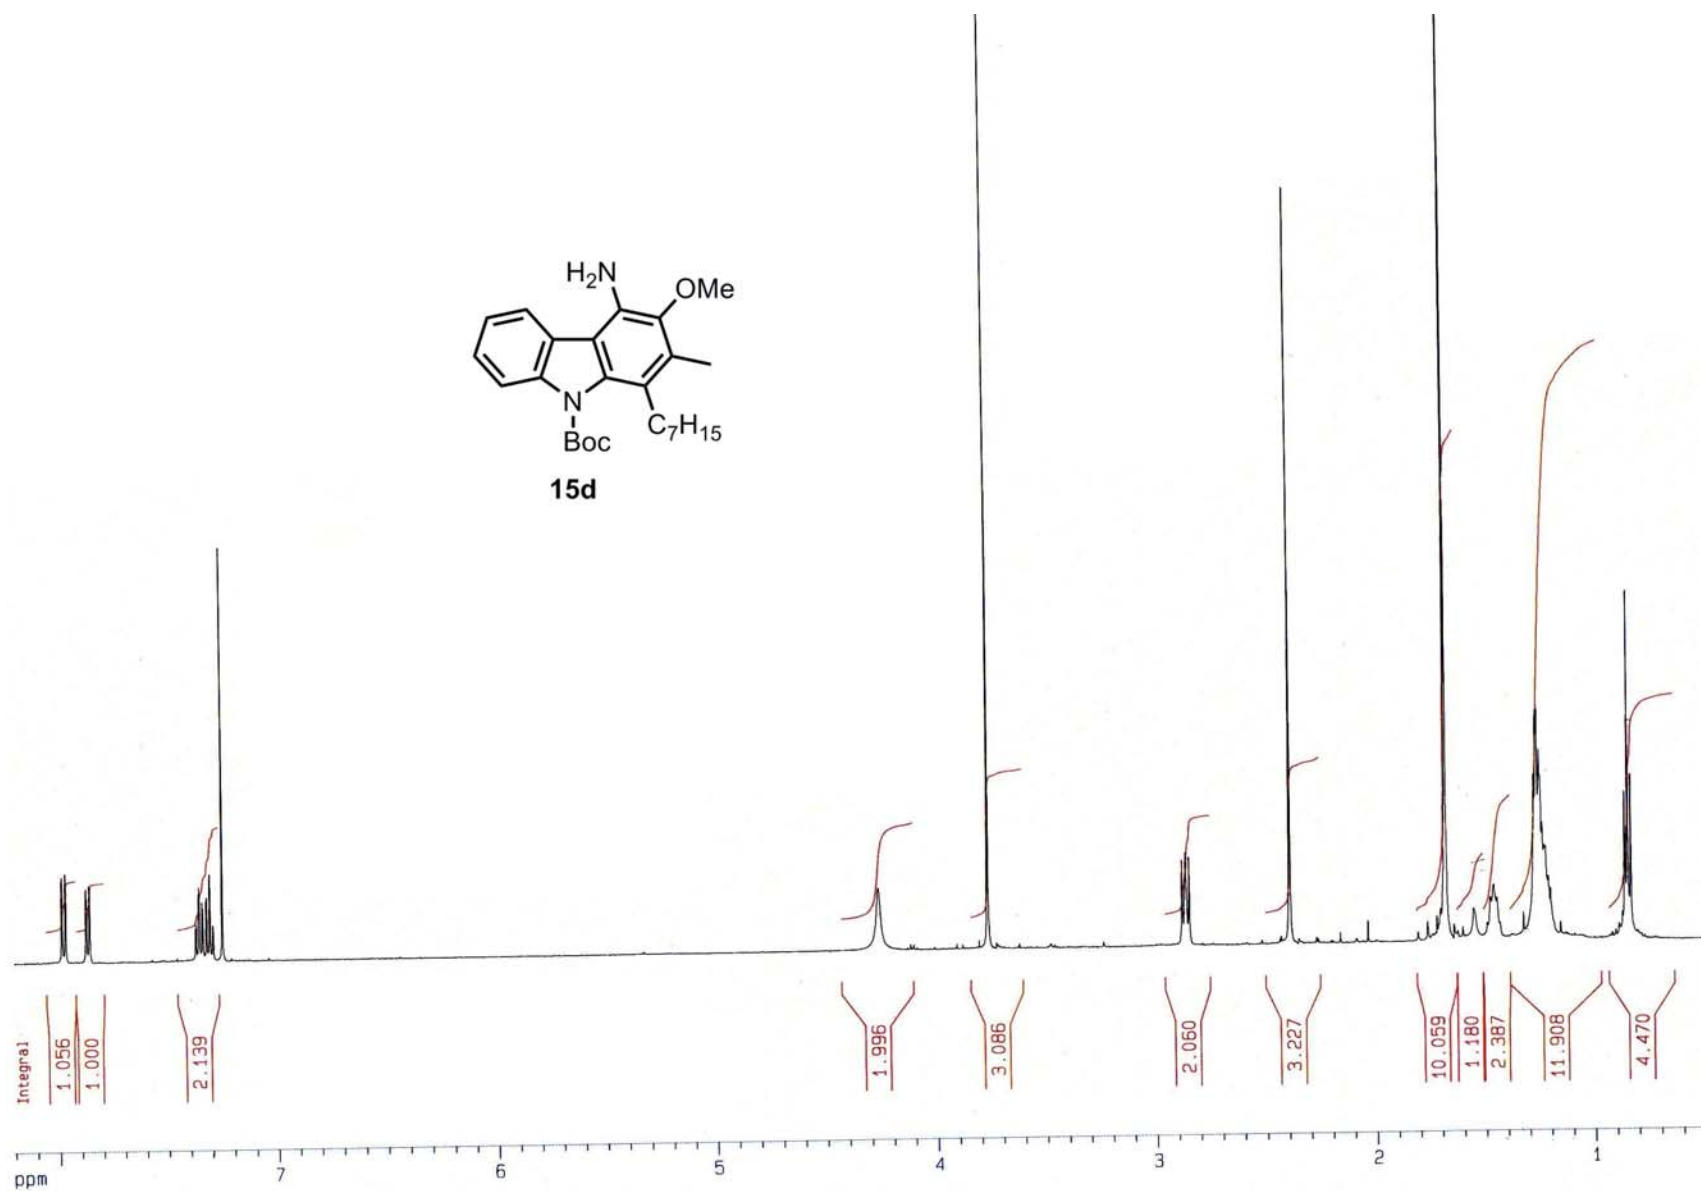

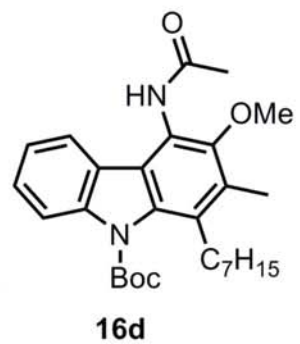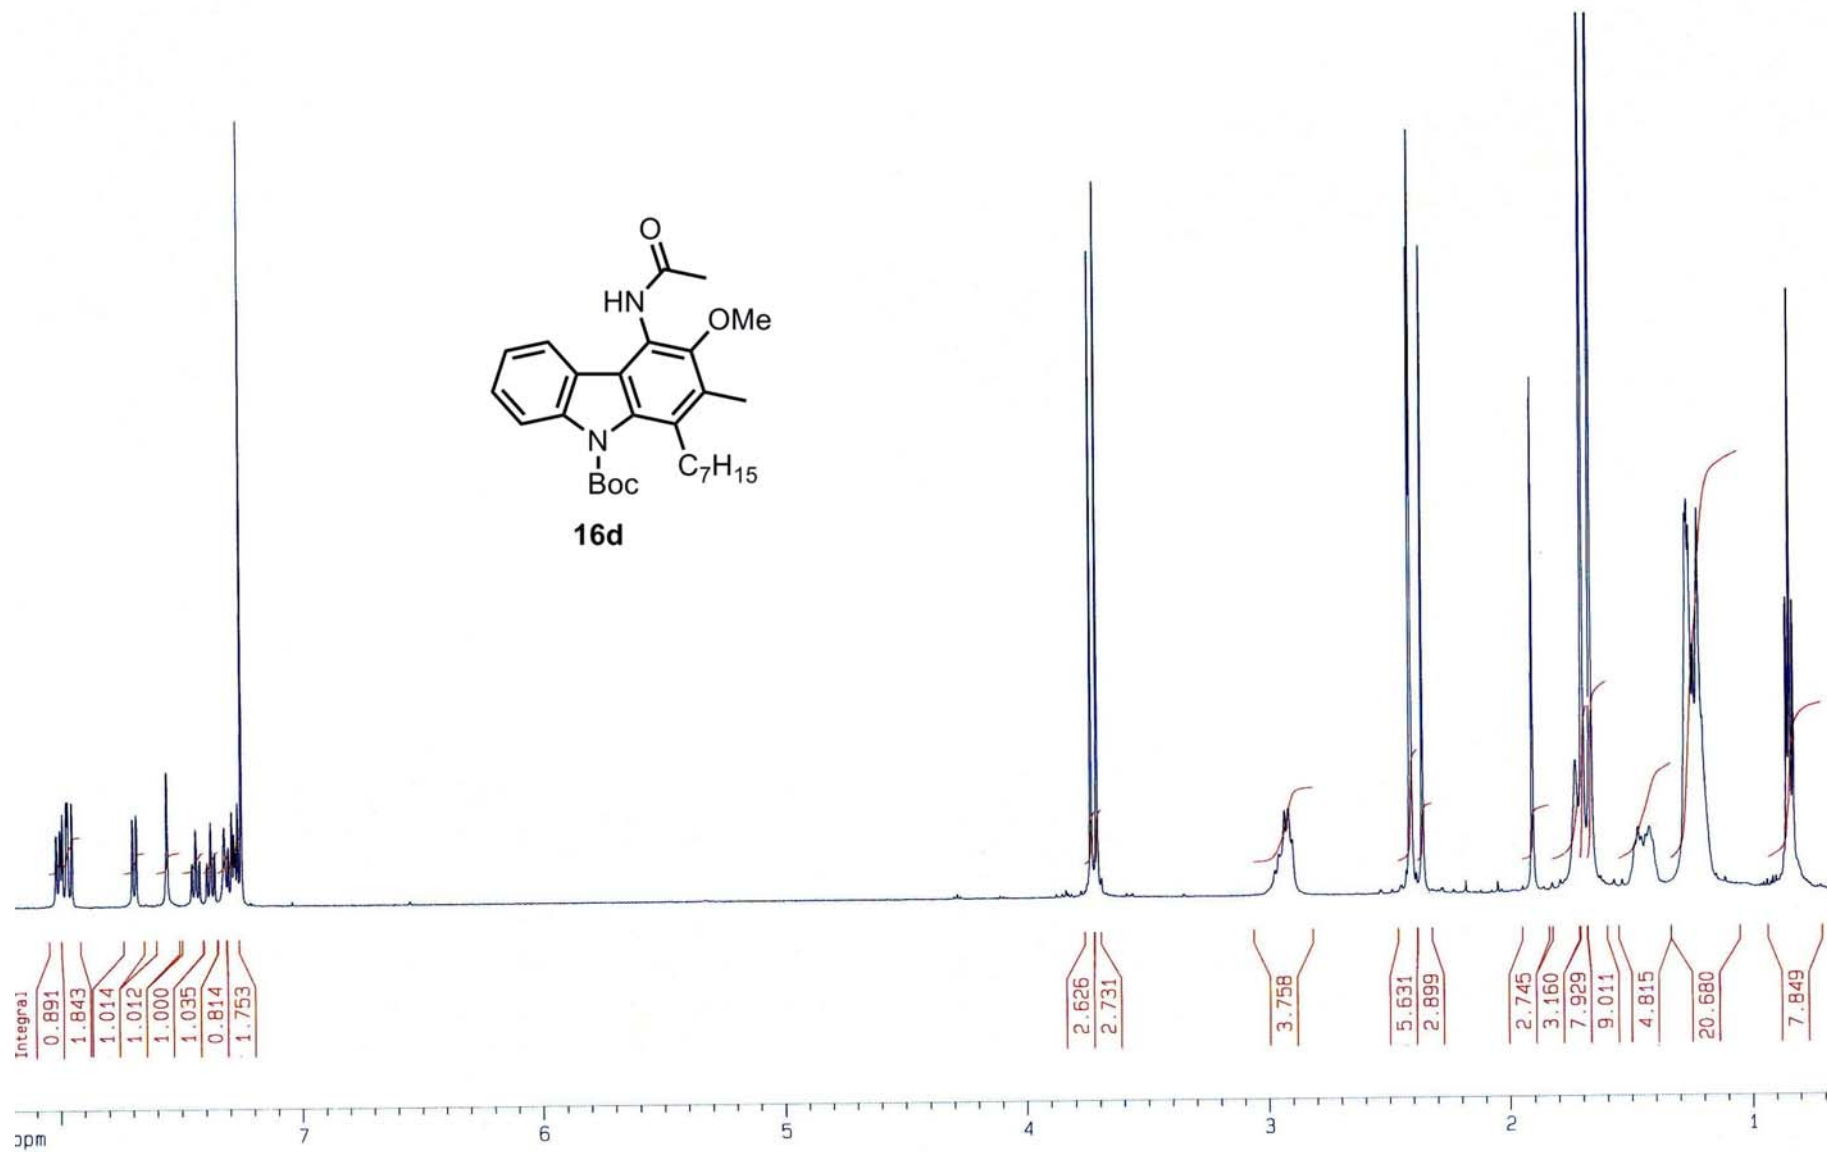



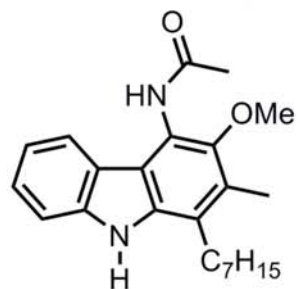

**17d**

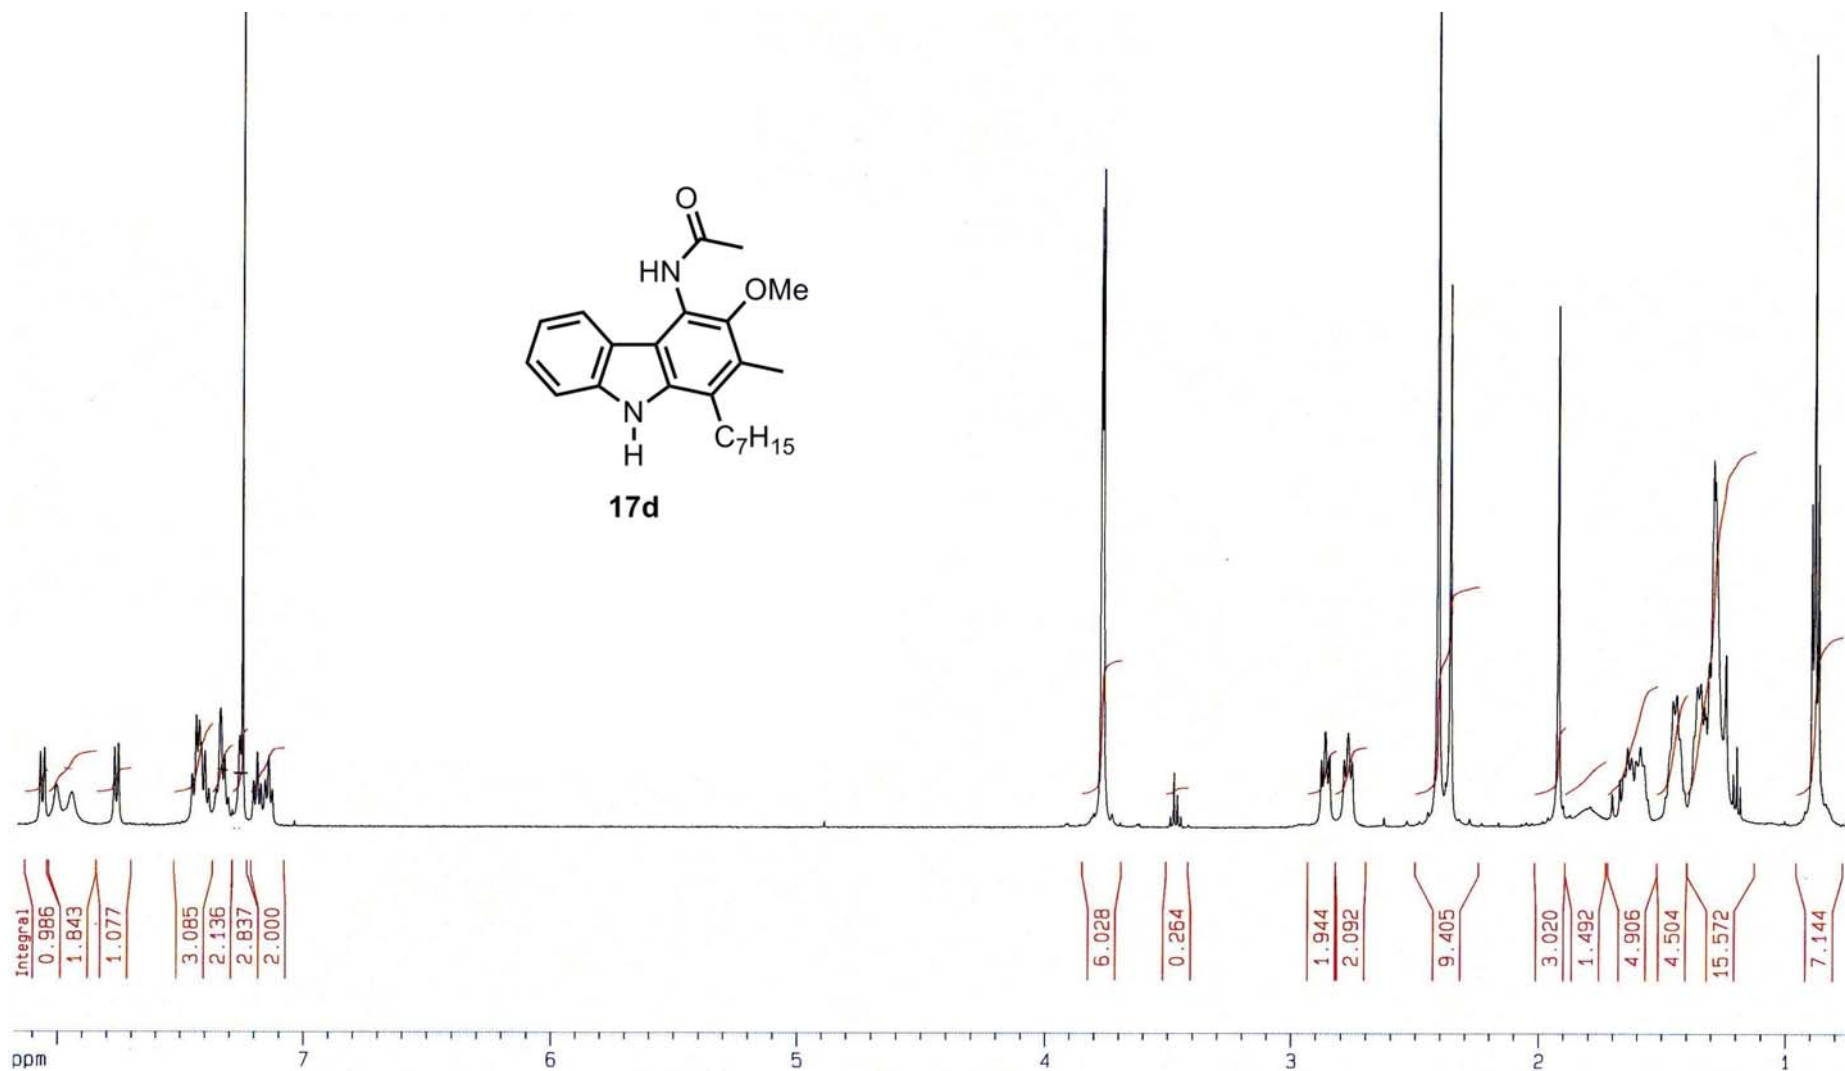

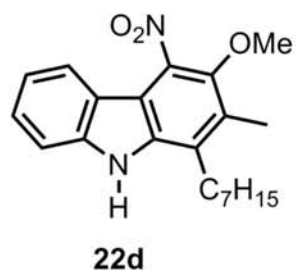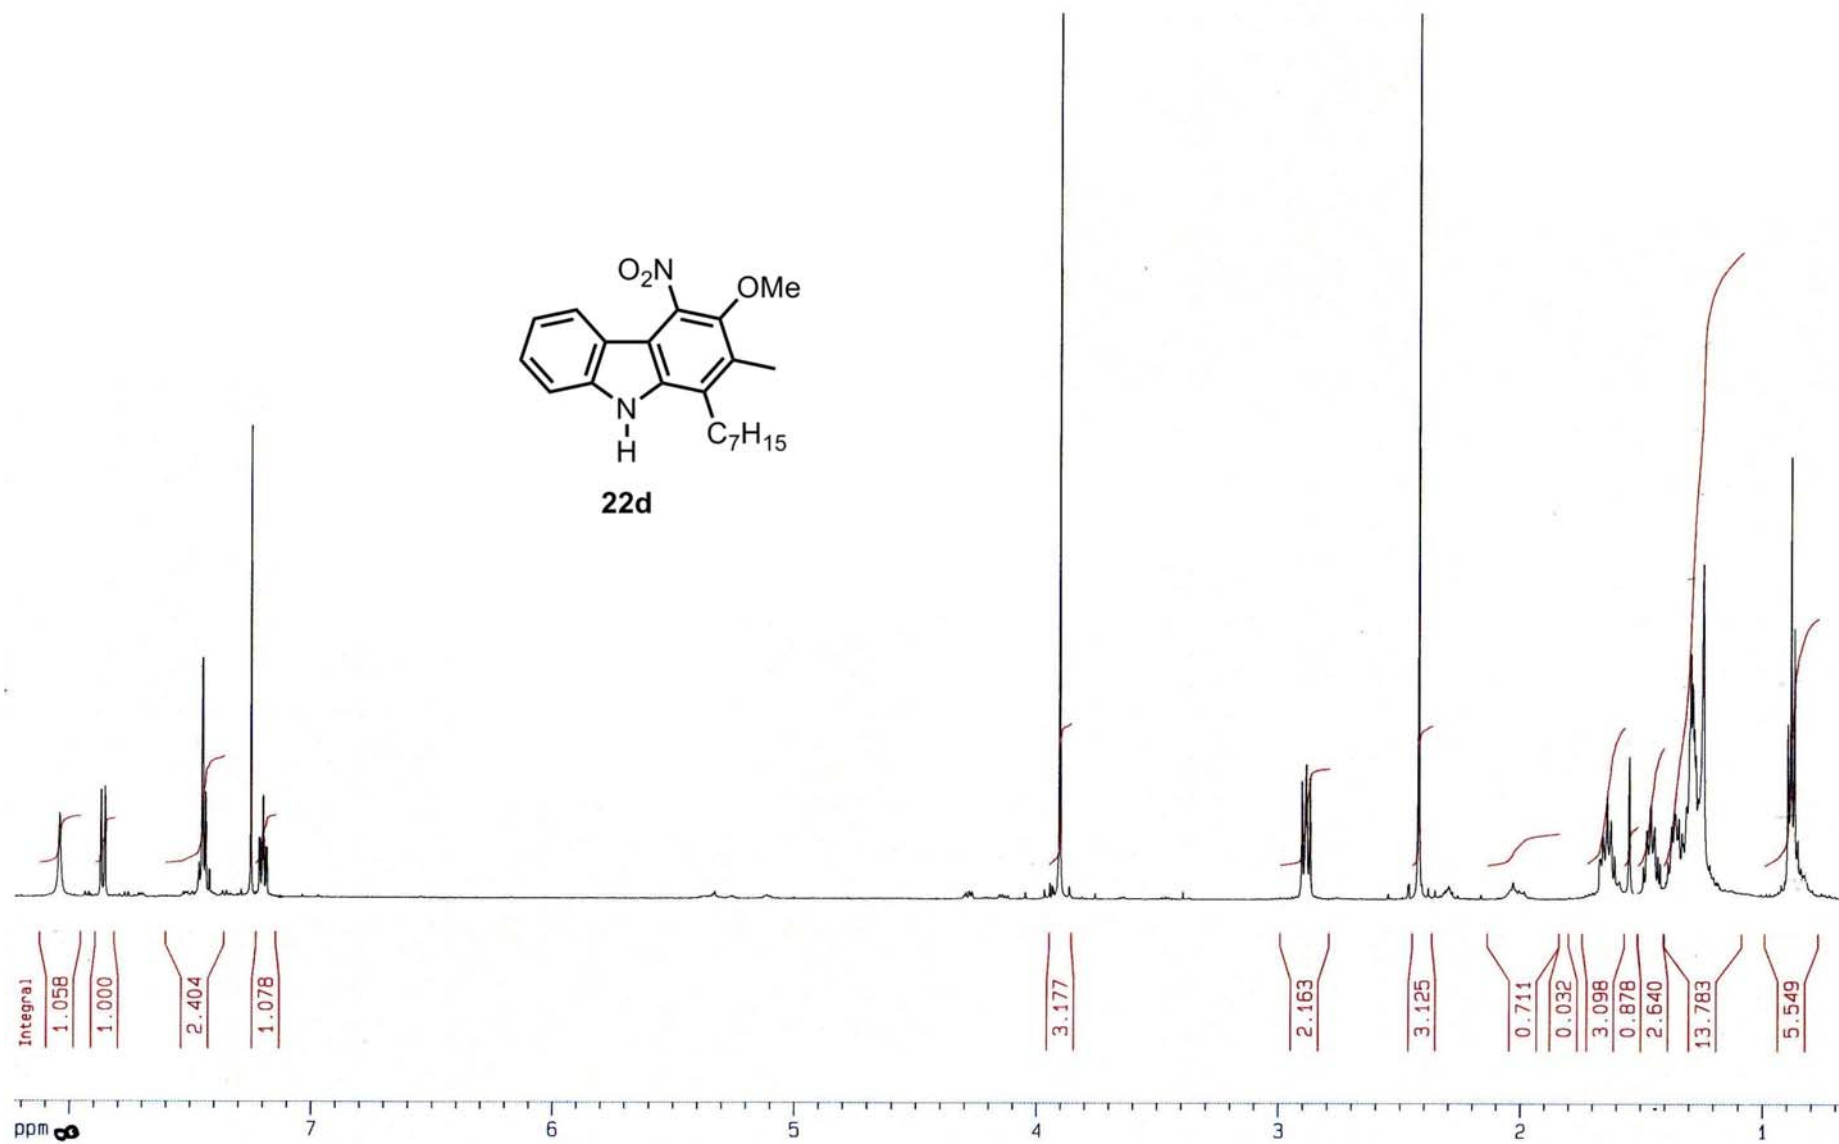

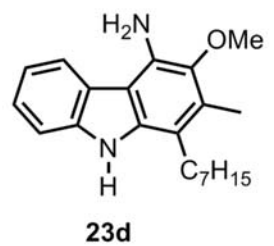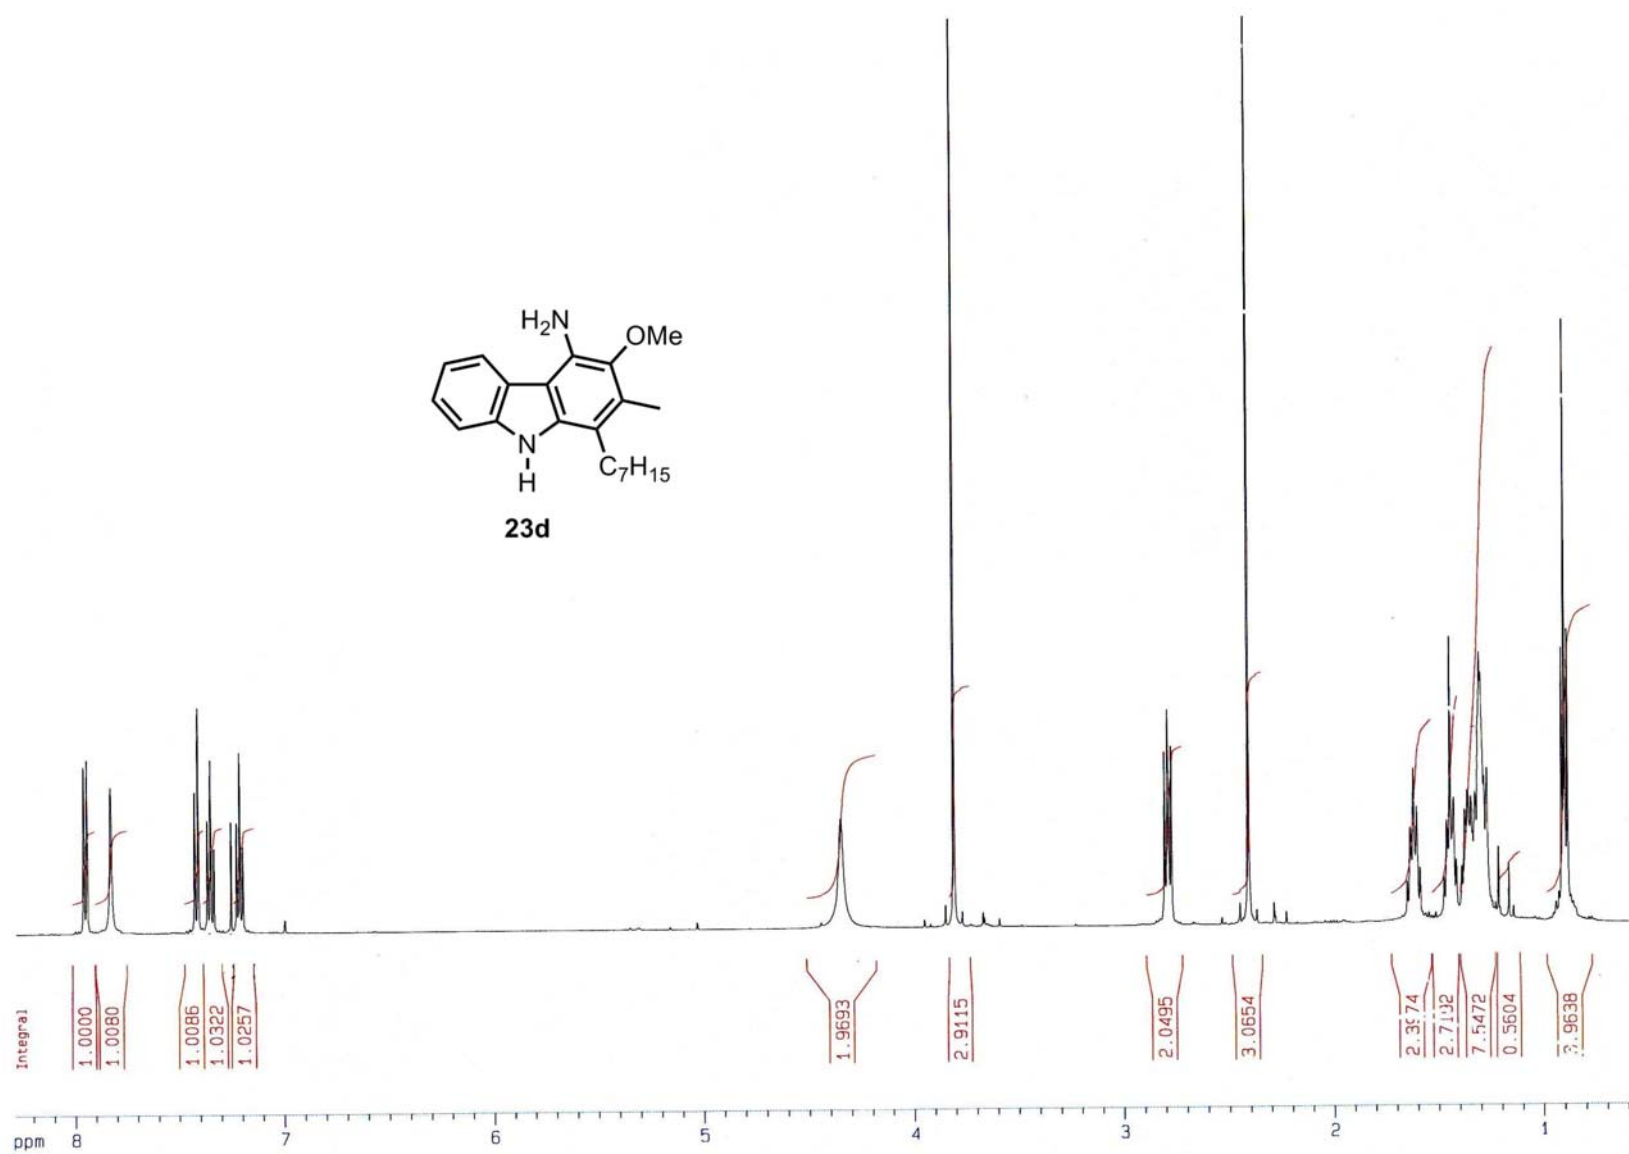

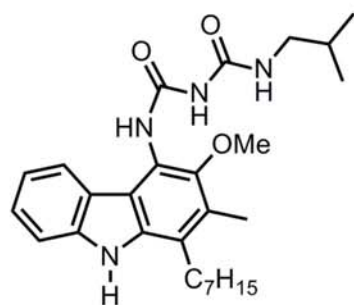

**24d**

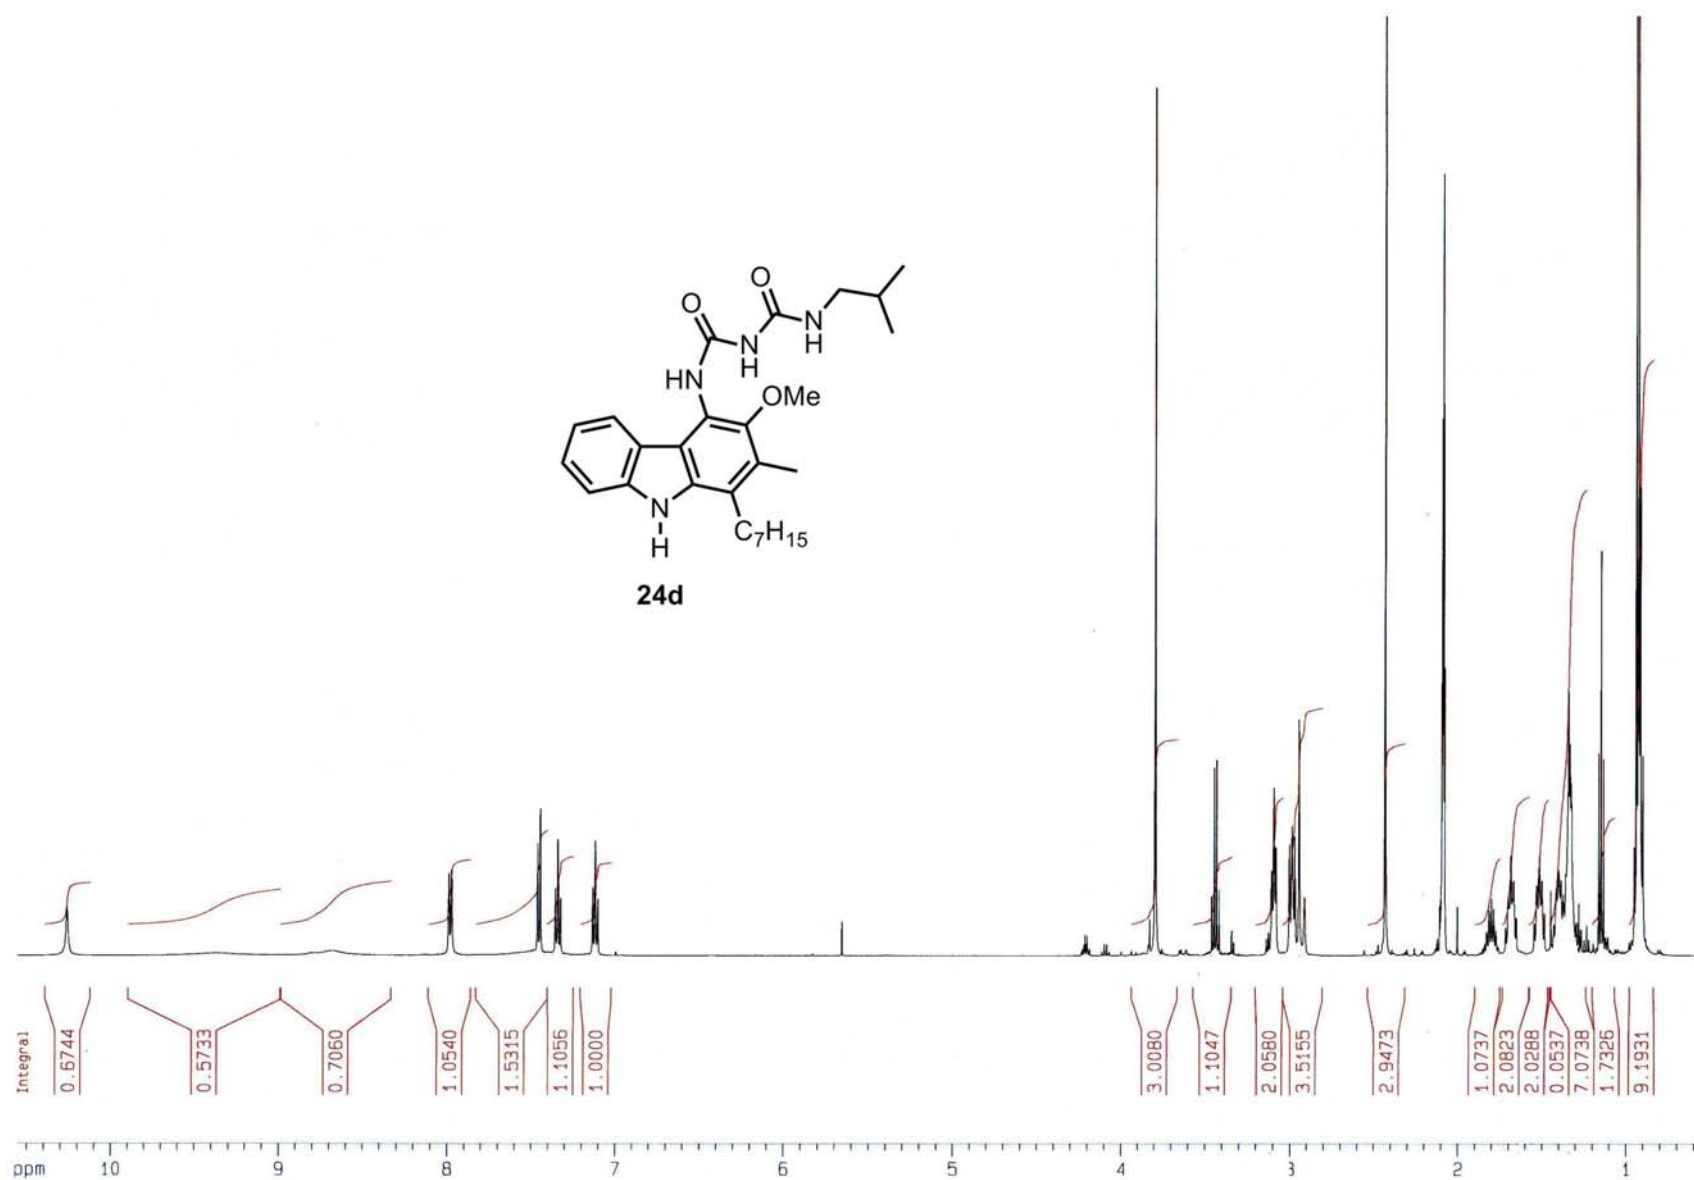

Supplement: b821039j-2.pdf [file b821039j-2.pdf]
